# Early and Late Effects of Maternal Experience on Hippocampal Neurogenesis, Microglia, and the Circulating Cytokine Milieu

Rand S Eid<sup>1</sup>, Jessica A Chaiton<sup>2</sup>, Stephanie E Lieblich<sup>2</sup>, Tamara S Bodnar<sup>3</sup>, Joanne Weinberg<sup>1,3</sup>, and Liisa AM Galea<sup>1,2,4</sup>

<sup>1</sup> Graduate Program in Neuroscience, University of British Columbia, Vancouver, BC, Canada

<sup>2</sup> Department of Psychology, University of British Columbia, Vancouver, BC, Canada

<sup>3</sup> Department of Cellular and Physiological Sciences, University of British Columbia, Vancouver, BC, Canada

<sup>4</sup> Djavad Mowafaghian Centre for Brain Health, University of British Columbia, Vancouver, BC, Canada

Corresponding author:

Dr. Liisa Galea

Djavad Mowafaghian Centre for Brain Health

University of British Columbia

2215 Wesbrook Mall

Vancouver, BC

Canada, V6T 1Z3

Tel: +1 (604) 822 6536

[Email: liisa.galea@ubc.ca](mailto:liisa.galea@ubc.ca)

## 1 **Abstract**

2 The maternal brain displays considerable plasticity, and motherhood is associated with changes in  
3 affective and cognitive function. Motherhood can alter the trajectory of brain ageing, including  
4 modifications to neuroplasticity and cognition. Here, we investigated the short- and long-term effects of  
5 motherhood on hippocampal neurogenesis, microglial density and morphology, and circulating  
6 cytokines, domains known to be altered with age and implicated in cognition and mood. Female rats  
7 were bred then euthanized during gestation or at various postpartum timepoints, culminating in middle  
8 age, and nulliparous rats served as age-matched controls. Hippocampal neurogenesis was significantly  
9 suppressed during gestation and the postpartum period. Interestingly, neurogenesis declined significantly  
10 in middle-aged nulliparous rats, but increased in primiparous rats across the same period. Transient  
11 postpartum adaptations to the neuroimmune environment of the hippocampus were evidenced, as Iba-1-  
12 immunoreactive microglia assumed a de-ramified morphology followed by increased density.  
13 Intriguingly, ageing-related changes in circulating cytokines were dependent on parity. These  
14 adaptations in neurogenic and immune processes may have ramifications for maternal mood and  
15 cognition across the peripartum period and beyond.

16 **Keywords:** pregnancy; postpartum; motherhood; doublecortin; cell proliferation; Iba-1;  
17 proinflammatory cytokines; anti-inflammatory cytokines.

## 18 **1. Introduction**

19 Dramatic physiological adaptations occur during pregnancy and the postpartum period to ensure  
20 offspring development and survival (Dulac et al., 2014; Hall et al., 2011; Lain and Catalano, 2007;  
21 PrabhuDas et al., 2015; Rossant and Cross, 2001). The maternal brain exhibits substantial plasticity,  
22 including large-scale volumetric changes (Galea et al., 2000; Hoekzema et al., 2016; Oatridge et al.,  
23 2002), alterations in cellular architecture (Leuner and Gould, 2010; Pawluski and Galea, 2006), and  
24 hippocampal neurogenesis (Darnaudéry et al., 2007; Leuner et al., 2007; Pawluski and Galea, 2007).  
25 While this capacity for plasticity is likely essential for the onset of a repertoire of maternal behaviours  
26 (Bridges, 2015), motherhood is also associated with changes in affective function (Bennett et al., 2004;  
27 Darcy et al., 2011; O'Hara, 2009), hypothalamic-pituitary-adrenal axis (HPA) regulation (Slattery and  
28 Neumann, 2008), and cognition (Cuttler et al., 2011; De Groot et al., 2006; Galea et al., 2000; Kinsley et  
29 al., 1999; Pawluski et al., 2006). Interestingly, motherhood may improve the ageing trajectory in terms  
30 of cognition (Colucci et al., 2006; Cui et al., 2014; Gatewood et al., 2005), neuroplasticity (Barha et al.,  
31 2015; Barha and Galea, 2011; Galea et al., 2018), and cellular aging (Barha et al., 2016), suggesting that  
32 the effects of the motherhood on the brain may be long lasting. However, the mechanisms underlying  
33 alterations in the ageing maternal brain are not known, but may include modifications in neurogenic or  
34 immune processes, both of which were examined in the current study.

35 The hippocampus produces new neurons across the lifespan (Altman and Das, 1965; Boldrini et  
36 al., 2018; Eriksson et al., 1998) and these neurons play a role in certain aspects of learning and memory  
37 (Yau et al., 2015), mood regulation (Sahay and Hen, 2007), and the stress response (Snyder et al., 2011).  
38 Importantly, several studies found postpartum reductions in hippocampal cell proliferation (Darnaudéry  
39 et al., 2007; Leuner et al., 2007; Pawluski and Galea, 2007), cell survival (Pawluski and Galea, 2007)  
40 and the density of immature neurons (Workman et al., 2015). Interestingly, motherhood may have  
41 contrasting effects on hippocampal neurogenesis with age, as studies have found increased neurogenesis  
42 in middle-aged primiparous and multiparous rats relative to age-matched nulliparous controls (Barha et  
43 al., 2015; Galea et al., 2018). This finding signifies that parity can have delayed pro-neurogenic effects,  
44 thus the current study aimed to determine the timeline by which these changes may emerge.

45 Adaptations to the maternal immune system are well documented, and necessary for the  
46 establishment and maintenance of pregnancy (Aghaeepour et al., 2017; Mor and Cardenas, 2010). In  
47 contrast, and despite the growing recognition of plasticity in the maternal brain, there is a paucity of  
48 research on potential neuroimmune adaptations with maternal experience. Few studies to date have

49 examined microglia, the innate immune cells of the brain, in pregnant and postpartum rats (Haim et al.,  
50 2017; Posillico and Schwarz, 2016). Microglia alterations were found in several regions of the maternal  
51 brain, and normalized by postpartum day 21 in all regions except the hippocampus (Haim et al., 2017).  
52 This indicates that changes in the neuroimmune environment of the maternal hippocampus may be  
53 longer lasting. The hippocampus undergoes considerable plasticity in the peripartum period (Galea et al.,  
54 2014), perhaps not surprisingly given its role in cognitive function (Sweatt, 2004) and mood regulation  
55 (Campbell and MacQueen, 2004). Neuroimmune processes are implicated in cognition (Lee et al., 2008;  
56 Parkhurst et al., 2013; vom Berg et al., 2012), stress (Hodes et al., 2014; Kreisel et al., 2014), and mood  
57 (Setiawan et al., 2015), raising the possibility that changes in the neuroimmune environment of the  
58 hippocampus may represent a substrate for motherhood-related changes in hippocampal function.

59 In the non-maternal brain, immune processes have been implicated in the regulation of adult  
60 hippocampal neurogenesis, under basal and inflammatory conditions (reviewed in Sierra et al., 2014).  
61 For example, inflammation was first demonstrated to suppress neurogenesis by studies utilizing systemic  
62 or intrahippocampal administration of the bacterial endotoxin lipopolysaccharide (Ekdahl et al., 2003;  
63 Monje, 2003). Microglia also maintain homeostasis in the healthy adult neurogenic niche via  
64 phagocytosis of apoptotic new cells (Sierra et al., 2010). In the maternal brain, one study found that  
65 alterations in T-cell activity accounted for at least some of the postpartum-associated reductions in  
66 neurogenesis (Rolls et al., 2008). To date, however, no studies have concurrently examined adaptations  
67 in microglia and neurogenesis in the maternal hippocampus, and therefore the experiments reported here  
68 aimed to fill this gap.

69 Given the extensive cross-talk between the central nervous system and the immune system  
70 (Louveau et al., 2015), motherhood-related adaptations in the immune system can potentially drive  
71 plasticity in the brain. Reproductive immunology research has been primarily focused on aspects of  
72 immune function that affect fetal development and the success of pregnancy (PrabhuDas et al., 2015).  
73 Although many of the maternal immune adaptations normalize in the postpartum period (Groer et al.,  
74 2015), there is evidence indicating that maternal experience can leave a lasting footprint on the immune  
75 system (Barrat et al., 1997a, 1997b, 1999; Helle et al., 2004). For example, the risk of dying of  
76 infectious disease after the age of 65 was increased in mothers of twins, compared to mothers of  
77 singletons (Helle et al., 2004). This effect may be related to reproductive effort, and is perhaps indicative  
78 of accelerated immunosenescence (Helle et al., 2004). Although the long-term effects of parity on the  
79 immune system have received little attention in animal models, delayed senescence in certain aspects of  
80 immune function is evidenced in parous relative to non-parous mice (Barrat et al., 1997b, 1997a, 1999).

81 In tandem with neurogenic and neuroimmune markers, our current study aimed to assess whether  
82 maternal experience can alter the circulating cytokine profile at various intervals following parturition,  
83 ending well after the reproductive event itself. The circulating cytokine profile is not only informative to  
84 the general inflammatory state, but may have ramifications for brain and behaviour as peripheral  
85 cytokine signals propagate to the brain (Miller et al., 2014; Quan and Banks, 2007). Preclinical cytokine  
86 data may also be valuable for comparative purposes, as circulating cytokines levels are accessible  
87 biomarkers in clinical populations (Guerreiro et al., 2007).

88 In this study, we examined the short- and long-term effects of parity on microglia density and  
89 morphology, and on neurogenesis in the hippocampus. These measures were examined across age and  
90 time since parturition, extending into middle age. To gain information about the peripheral inflammatory  
91 milieu, we quantified concentrations of various serum cytokines across the same time points. We  
92 expected parity to suppress hippocampal neurogenesis in the short term, and to increase neurogenesis in  
93 middle age. At least in the short term, we expected parity to modify microglial density and morphology  
94 in the dentate gyrus. Finally, we expected alterations in the circulating cytokine profile during pregnancy  
95 and the early postpartum period, and hypothesized that parity would modulate the age-related changes in  
96 the circulating cytokine milieu.

## 97 **2. Materials and Methods**

### 98 **2.1. Animals**

99 Young adult female and male Sprague-Dawley rats were purchased from Charles River Laboratories  
100 (Montreal, Canada), weighing at 200–250g. All rats arrived at our facility at the same time. Rats were  
101 maintained on a 12-hour light/dark cycle (lights on at 07:00 h), in standard laboratory conditions  
102 ( $21 \pm 1^\circ\text{C}$ ;  $50 \pm 10\%$  humidity) and given *ad libitum* access to water and food (Purina Rat Chow).  
103 Female rats were initially pair-housed, and except for the breeding period, all rats were housed in  
104 female-only colony rooms. Males were used for breeding purposes only. Nulliparous rats were never  
105 housed in the same colony room as primiparous rats when they were breeding or had active litters. To  
106 minimize potential environmental exposure differences between nulliparous and primiparous groups,  
107 primiparous rats were transferred to the nulliparous colony room on the day that their litters were  
108 weaned (postpartum day 21). All procedures were performed in accordance with ethical guidelines set  
109 by the Canadian Council on Animal Care and approved by the Animal Care Committee at the University  
110 of British Columbia.

## 111 **2.2. Breeding procedure and experimental groups**

112 Female rats were bred at approximately 7 months of age. At 18:00 h daily, each pair of female cage-  
113 mates was placed with one male. Vaginal lavage samples were obtained the following morning, between  
114 08:00 and 09:00 h, and examined for the presence of sperm cells. The detection of sperm cells indicated  
115 Gestation Day 1 (GD1), at which point the pregnant female was weighed and single-housed. Primigravid  
116 or primiparous rats (i.e. pregnant or mothering for the first time; n=30) were randomly assigned to one  
117 of six groups (n=5 each) according to the timeline of euthanasia relative to gestation. This included one  
118 gestational group at Gestation Day 13 (GD13), and four postpartum groups: Postpartum Day 8 (PPD8),  
119 Postpartum Day 30 (PPD30), Postpartum Day 90 (PPD90), and Postpartum Day 180 (PPD180).  
120 Nulliparous rats (i.e. never pregnant; n=30) were randomly assigned to control groups (n=5 each) that  
121 were age-matched to each of the primiparous groups. Specifically, nulliparous rats at approximately 7,  
122 7.5, 8, 10, and 13 months of age served as control groups for primiparous rats at GD13, PPD8, PPD30,  
123 PPD90, and PPD180, respectively (experimental groups are detailed in **Figure 1**). These timepoints  
124 were chosen to capture: mid-gestation (GD13), as a previous study found reductions in the survival of  
125 hippocampal neurons produced at this time (Rolls et al., 2008); an early postpartum timepoint (PPD8)  
126 that avoids the acute inflammatory state surrounding parturition (Catalano et al., 2010) and is associated  
127 with declines in cell proliferation (Leuner et al., 2007); a post-weaning, late postpartum timepoint  
128 (PPD30) shown to be associated with reduced neurogenesis (Workman et al., 2015); and finally, for a  
129 time-course analysis of the effects of parity on the ageing trajectory, two further timepoints were  
130 selected leading to middle age (PPD180), as previous studies reported increased neurogenesis in middle-  
131 aged rats with previous maternal experience (Barha et al., 2015; Galea et al., 2018). To account for  
132 potential effects of social housing, nulliparous controls were single-housed at GD1 of their primiparous-  
133 counterparts and until experimental endpoint. For all postpartum groups, litters were culled to include  
134 between 8-10 pups, with approximately 50% males and females. When the original sex ratio or litter size  
135 was not sufficient to achieve this, pups were cross-fostered between dams that had given birth the same  
136 day. Pups were weaned at PPD21 for all postpartum groups, except for the PPD8 group in which the  
137 dams remained with their litter until just prior to euthanasia. After weaning, primiparous rats remained  
138 single-housed until experimental endpoint. One rat from the nulliparous 10-month-old group was  
139 eliminated from the study due to a mammary gland tumor.

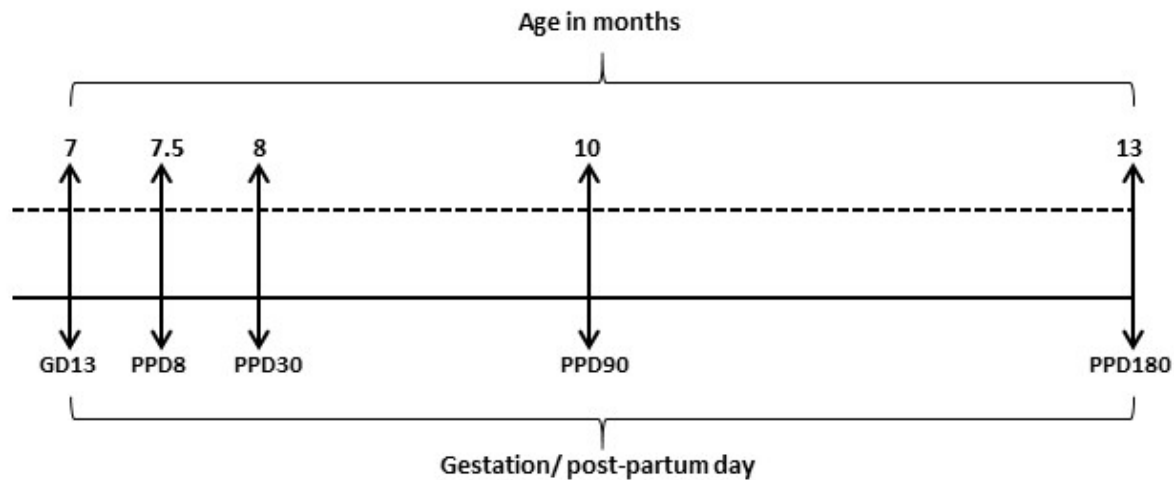

**Figure 1. Experimental groups.** Primigravid or primiparous rats (n=5/group) were euthanized at gestation day 13 (GD13), postpartum day 8 (PPD8), postpartum day 30 (PPD30), postpartum day 90 (PPD90), or postpartum day 180 (PPD180). Nulliparous rats (n=5/group) were age-matched to their primiparous counterparts, and euthanized along the same timeline, depicted as approximate age in months. Arrows indicate euthanasia day.

### 140 **2.3. Perfusion and tissue collection**

141 All perfusions were completed between 9:00 and 11:00 am. The rats were deeply anesthetized with an  
142 overdose of sodium pentobarbital (i.p.), and blood was collected via cardiac puncture. Brains were  
143 collected immediately after transcatheterial perfusion with 60ml of cold 0.9% saline, followed by 120ml of  
144 cold 4% paraformaldehyde (PFA). Brains were stored at 4°C in 4% PFA for 24 hours, then transferred  
145 into a 30% sucrose solution (in 0.1 M Phosphate Buffer) until sectioning. In the group euthanized during  
146 gestation, the uterus was dissected to confirm pregnancy. To obtain serum, blood samples were allowed  
147 to clot overnight at 4°C, then centrifuged at 10g for 15 minutes and serum aliquots were stored at -20°C  
148 until processing.

### 149 **2.4. Brain Tissue Processing and Immunohistochemistry**

150 Brains were sliced into 40 µm coronal sections using a Leica SM2000R Microtome (Richmond Hill,  
151 Ontario, Canada). Sections were collected in series of 10 along the rostral-caudal axis of the  
152 hippocampus, then stored at -20 °C in a cryoprotectant consisting of 30% ethylene glycol (Sigma-  
153 Aldrich, St. Louis, MO, USA) and 20% glycerol (Sigma-Aldrich) in 0.1 M phosphate-buffer (PB, pH  
154 7.4). Sections were thoroughly rinsed (5 x 10 mins) in PBS prior to staining to remove the  
155 cryoprotective medium. All immunohistochemical procedures were conducted on free-floating brain  
156 sections, and on a rotator at room temperature unless otherwise noted.

157 **2.4.1. Doublecortin (DCX):** DCX is a microtubule-associated protein expressed in immature neurons for  
158 21 days after production in adult rats (Brown et al., 2003), and thus was used as a marker of adult  
159 hippocampal neurogenesis. Tissue was rinsed in 0.1M PBS (pH 7.4; 5 x 10 minutes) between each of the  
160 following procedures. Tissue was treated with 0.3% hydrogen peroxide (H<sub>2</sub>O<sub>2</sub>, in dH<sub>2</sub>O) for 30 minutes,  
161 then incubated for 24 hours at 4°C in a primary antibody solution containing 1:1000 goat anti-  
162 doublecortin (Santa Cruz Biotechnology, Santa Cruz, CA, USA) in 3% normal rabbit serum (NRS) and  
163 0.4% Triton-X in 0.1M PBS. Next, tissue was transferred to a secondary antibody solution consisting of  
164 1:500 rabbit anti-goat (Vector Laboratories, Burlington, ON, Canada) in 0.1 M PBS for 24 hours at 4°C.  
165 Finally, tissue was transferred to an avidin-biotin complex (ABC; Elite kit; 1:1000, Vector Laboratories)  
166 in PBS for 4 hours, then immunoreactants were visualized with a Nickel-enhanced DAB reaction  
167 (Vector Laboratories). Sections were mounted onto glass slides and allowed to dry, then dehydrated in  
168 increasing graded ethanol, defatted with xylenes, and cover-slipped with Permount (Fisher Scientific).

169 **2.4.2. Ionized calcium binding adaptor molecule-1 (Iba-1):** Iba-1 is a calcium-binding protein widely  
170 used as a microglial marker (Korzhevskii and Kirik, 2016). Tissue was rinsed in 0.1 M PBS (pH 7.4; 3 x  
171 10 minutes) between each of the following procedures. Tissue was incubated in 0.3% hydrogen peroxide  
172 (H<sub>2</sub>O<sub>2</sub>, in dH<sub>2</sub>O) for 25 minutes, then blocked with 10% normal goat serum (NGS) in 0.5% Triton-X in  
173 0.1M PBS. Tissue was then transferred to a primary antibody solution for 18 hours at 4°C, consisting of  
174 1:1000 anti-Iba-1 (Wako, Osaka, Japan) in 10% NGS and 0.4% Triton-X in 0.1M PBS. Next, tissue was  
175 incubated in a secondary antibody solution for 1 hour, containing 1:500 biotinylated anti-rabbit (Vector  
176 Laboratories) in 2.5% NGS and 0.4% Triton X in PBS. Finally, tissue was transferred to an avidin-biotin  
177 complex (ABC; Elite kit; 1:50, Vector Laboratories) in 0.4% Triton-X in PBS for 1 hour, and  
178 immunoreactivity was visualized with a Nickel-enhanced DAB reaction (Vector Laboratories). Sections  
179 were mounted onto glass slides and allowed to dry, then counterstained with cresyl violet, dehydrated in  
180 a series of ethanol solutions of increasing concentrations, defatted with xylenes, and cover-slipped with  
181 Permount (Fisher Scientific).

182 **2.4.3. Ki67:** Ki67 is expressed during all active phases of the cell cycle, but not during G<sub>0</sub> phase  
183 (Scholzen and Gerdes, 2000), and therefore was used as a marker of cell proliferation in the dentate  
184 gyrus. Tissue was rinsed in 0.1 M PBS (pH 7.4; 3 x 10 minutes) between each of the following  
185 procedures. Tissue was incubated in a primary antibody solution for 48 hours at 4°C, consisting of 1:200  
186 mouse anti-Ki67 (NCL-L-Ki67-MM1; Leica Biosystems, Newcastle, UK) in 3% normal donkey serum  
187 (NDS), and 0.3% Triton-X in 0.1M PBS. Next, tissue was incubated for 18 hours at 4°C in a secondary  
188 antibody solution consisting of 1:200 donkey anti-mouse IgG, Alexa Fluor 555 (Molecular Probes,



189 Eugene, Oregon, USA) in 3% NDS in 0.1M PBS. Sections were counterstained with DAPI (2.5 minutes;  
190 300nM; ThermoFisher, Waltham, WA, USA), mounted onto glass slides, and cover-slipped with an anti-  
191 fade medium (2.5% Polyvinyl alcohol-Dabco).

## 192 **2.5. Microscopy, Cell Quantification, and Morphological analyses**

193 An investigator blinded to experimental conditions quantified DCX- and Iba-1-, and Ki67-  
194 immunoreactive cells and analyzed cell morphology. See **Fig. 4B, 6D-F, and 7** for representative  
195 photomicrographs.

196 **2.5.1. Iba-1:** Under a 40x objective on a Nikon E600 microscope, an exhaustive quantification of Iba-1-  
197 IR cells was completed in four hippocampal slices from each animal, as we have done previously  
198 (Mahmoud et al., 2016a). This included two dorsal and two ventral sections, with approximate Bregma  
199 coordinates of -3.12, -3.48, 6.00, and -6.36. Iba-1-IR cells were quantified in the dentate gyrus,  
200 specifically in the granule cell layer (GCL), the subgranular zone (SGZ), and within an approximately  
201 50 $\mu$ m band of the molecular layer (ML).

202 Under baseline conditions microglia typically display ramified morphology, characterized by highly  
203 branched and long processes that continuously survey their environment (Nimmerjahn et al., 2005).  
204 Under inflammatory states, microglial processes typically retract and the cell can take on an amoeboid  
205 morphology, in which the cell become enlarged and void of processes; thus, microglial morphology is  
206 widely used as a proxy-measure of functional state (Karperien et al., 2013). Here, Iba-1-IR cell  
207 morphology was analyzed utilizing NIS Elements Basic Research software (Nikon) under a Nikon E600  
208 microscope. Using the measure feature, soma size, in addition to cell process length and number  
209 (Karperien et al., 2013) were measured live at 40x for every cell within a 23672.24  $\mu$ m<sup>2</sup> region of  
210 interest (ROI), with 3 ROIs each for the dorsal and ventral hippocampus. Further, no more than one ROI  
211 was taken from an individual tissue slice, and ROIs were defined in 3 consistent locations in the GCL  
212 for both the dorsal and ventral hippocampus within each animal. Cells were defined by the presence of  
213 an Iba-1-IR cell body within the ROI, and this definition did not necessitate the presence of cell  
214 processes, by that ensuring the inclusion of any cells with amoeboid morphology. The average process  
215 length per cell was calculated using the total length and number of processes for each cell, and  
216 subsequently an average process length was calculated for each animal. Both primary (extending  
217 directly from the cell body) and secondary processes were taken into account in the analyses. There  
218 were no significant differences between groups in the number of Iba-1-IR cells that fell within the ROIs  
219 and were used for morphological analyses (see Table 1).

220 In an additional analysis of microglial morphology, Iba-1-IR cells were categorized into one of three  
221 morphological phenotypes, adapted from other methods (Haim et al., 2017; Schwarz et al., 2012).  
222 Specifically, as depicted in the representative photomicrographs in Fig. **6D-F**, cells were categorized as  
223 1) ramified microglia (highly branched, with longer processes), stout microglia (few, shorter processes),  
224 or 3) amoeboid microglia (no processes). This was performed under a 40X objective, in 4 hippocampal  
225 slices per animal, and involved a classification of all Iba-1-IR cells in the GCL, SGZ, and an  
226 approximately 50 $\mu$ m band of the ML. For each animal, the percentage of cells of each morphological  
227 phenotype was calculated.

228 **2.5.2. DCX:** Under a 100x objective on an Olympus CX22LED brightfield microscope, DCX-IR cells in  
229 the granule cell layer (GCL) were exhaustively counted in every 10<sup>th</sup> section of the hippocampus along  
230 the rostral-caudal axis. Thus, raw counts were multiplied by a factor of 10 to obtain an estimate of the  
231 total number of DCX-IR cells in the hippocampus. Previous work indicates that certain conditions or  
232 experiences, including reproductive experience (Workman et al., 2015), can alter the rate at which newly  
233 produced hippocampal neurons mature (Overstreet-Wadiche et al., 2006), and this can have functional  
234 consequences as changes in the maturational timeline can alter the rate of functional integration of these  
235 new neurons into existing hippocampal networks. Thus, to examine whether pregnancy and motherhood  
236 can alter the rate at which newly produced hippocampal neurons mature, we investigated the  
237 maturational stages of DCX-immunoreactive cells. Specifically, using the 100 $\times$  objective on an  
238 Olympus CX22LED brightfield microscope, 50 DCX-IR cells (25 dorsal GCL and 25 ventral GCL; each  
239 taken from 3 slices) were randomly selected for each animal for maturational staging. Cells were  
240 categorized into one of three maturational stages, based on previously established criteria (Plümpe et al.,  
241 2006): 1) proliferative (no process or short process), 2) intermediate (medium process with no  
242 branching), or 3) post-mitotic (long processes with branching in the GCL and ML). DCX-  
243 immunolabeled sections were also utilized to measure GCL areas in every 10<sup>th</sup> section of the  
244 hippocampus, using images taken at 4x and the ImageJ software. Volume was estimated using these  
245 areas and following Cavalieri's principle.

246 **2.5.3. Ki67:** Under a 100x objective on an Olympus CX22LED microscope equipped with  
247 epifluorescence, Ki67-IR cells in the GCL and SGZ of the DG were exhaustively counted in every 10<sup>th</sup>  
248 section of the hippocampus along the rostral-caudal axis. Raw counts were multiplied by a factor of 10  
249 to obtain an estimate of the total number of Ki67-IR cells in the DG.

250 **2.6. Serum cytokine and hormone quantification**

251 A multiplex immunoassay kit (V-PLEX Proinflammatory Panel 2, Rat) was purchased from Meso-Scale  
252 Discovery (Rockville, MD) and used according to manufacturer instructions to measure serum cytokine  
253 levels. The antibody pre-coated plates allowed for the simultaneous quantification of the following  
254 cytokines: Interferon-gamma (IFN- $\gamma$ ), Interleukin-1beta (IL-1 $\beta$ ), Interleukin-4 (IL-4), Interleukin-5 (IL-  
255 5), Interleukin-6 (IL-6), chemokine (C-X-C motif) ligand 1 (CXCL1), Interleukin-10 (IL-10),  
256 Interleukin-13 (IL-13), and tumor necrosis factor alpha (TNF- $\alpha$ ). Samples were run in duplicates, and  
257 plates were read with a Sector Imager 2400 (Meso Scale Discovery), and data was analyzed using the  
258 Discovery Workbench 4.0 software (Meso Scale Discovery). The assays' lower limits of detection  
259 (LLOD), which varied between analytes and plates (2 plates total), were as follows (pg/mL): IFN- $\gamma$ :  
260 0.163-0.266; IL-10: 0.233-0.313; IL-13: 0.78-2.7; IL-1 $\beta$ :1.48-1.62; IL-4:0.179-0.298; IL-5: 7.64-9.8;  
261 IL-6: 2.48-2.49; CXCL1: 0.085-0.164; and TNF- $\alpha$ : 0.156–0.186. Any values below the LLOD were  
262 assigned 0 pg/mL, as we have done previously (Bodnar et al., 2017). All samples were within the  
263 detection range for TNF- $\alpha$ , CXCL1, and IL-10. One sample fell below the LLOD for each of IFN- $\gamma$ , IL-  
264 4, and IL-13. For three cytokines, a number of samples fell below the LLOD (n=12 for IL-6, n=17 for  
265 IL-1 $\beta$ , and n=36 for IL-5). This panel was chosen as it includes a broad range of cytokines, some  
266 traditionally considered proinflammatory (IL-1 $\beta$ , IFN- $\gamma$ , TNF- $\alpha$ ), anti-inflammatory (IL-4, IL-10), and  
267 pleiotropic (IL-6), in addition to the chemokine CXCL1 which is important for neutrophil recruitment.  
268 Therefore, combined, these markers provide a comprehensive view of the inflammatory milieu.

269 Steroids hormones modulate neuroplasticity (Mahmoud et al., 2016b) and interact with the immune  
270 system (Schumacher et al., 2014). Further, circulating concentrations increase dramatically during  
271 pregnancy, drop abruptly at parturition, and diminish in ageing females. To investigate the potential  
272 mediating roles of steroid hormones, we measured 17 $\beta$ -estradiol, the most potent of the estrogens and  
273 the most abundant in premenopausal women and younger female rats (Rannevik et al., 1986). Serum  
274 17 $\beta$ -estradiol concentrations were quantified in sample taken at perfusion, using an ultra-sensitive  
275 estradiol radioimmunoassay (Beckman Coulter, Prague, Czech Republic) and in accordance with  
276 manufacturer's instructions, with all samples run in duplicates. The assay sensitivity is 2.2pg/ml, and the  
277 average inter- and intra-assay coefficients of variation were <15%.

## 278 **2.7. Statistical analyses**

279 Statistical analyses were performed using Statistica software (Tulsa, OK). All dependent variables were  
280 subjected to the Kolmogorov-Smirnov test for normality, and Bartlett's test for heterogeneity of  
281 variance. TNF- $\alpha$ , IL-1 $\beta$ , IL-5, and IL-6 data were not normally distributed and therefore Box-Cox

282 transformed prior to analyses. There were few violations to the heterogeneity of variance assumption,  
283 however these were corrected after Box-Cox transformation. Neural measures (DCX- and Ki67-IR cell  
284 number, Iba-1-IR density, length and number of processes) and serum measures (17 $\beta$ -estradiol, IFN- $\gamma$ ,  
285 IL-1 $\beta$ , IL-4, IL-5, IL-6, CXCL1, IL-10, IL-13, and TNF- $\alpha$ ) were each analyzed using factorial analysis  
286 of variance (ANOVA), with time (GD13/7 mo., PPD8/7.5 mo., PPD30/8 mo., PPD90/10 mo.,  
287 PPD180/13 mo.) and reproductive status (primi-gravid/parous, nulliparous) as the between-subject  
288 factors. Post-hoc analyses utilized Fisher's LSD. A priori we expected parity to modulate the age-related  
289 changes in cytokine levels, and density/morphology of Iba-1-IR cells. Any a priori comparisons were  
290 subjected to a Bonferroni correction. Pearson's correlations were performed on dependent variables of  
291 interest, and Fisher's z-transformation of correlation coefficients was used to assess the significance of  
292 the difference between correlations in nulliparous and primiparous groups. Serum 17 $\beta$ -estradiol  
293 concentrations were used as a covariate in ANOVAs, as circulating concentrations can influence  
294 neuroplastic and immune measures (Mahmoud et al., 2016b; Schumacher et al., 2014); ANOVAs are  
295 reported with the covariate in instances where there was a significant main effect of the covariate.  
296 Finally, as an exploratory approach, and to complement our findings from ANOVA analyses, we ran a  
297 principal component analysis (PCA) on the cytokine data, with the purpose of deriving information  
298 about the amount of variance accounted for by potential cytokine networks within the dataset.

### 299 **3. Results**

#### 300 **3.1. Serum 17 $\beta$ -estradiol was reduced in the early postpartum and increased in the late postpartum**

301 As expected, 17 $\beta$ -estradiol was reduced in the early postpartum period at PPD8, relative to age-matched  
302 nulliparous rats ( $p=0.015$ ; reproductive status by time interaction:  $F(4, 36)=4.45$ ,  $p=0.005$ ; **Fig. 2**). Further,  
303 primiparous rats at PPD30 had higher serum 17 $\beta$ -estradiol concentrations than age-matched nulliparous  
304 rats ( $p<0.008$ ; **Fig. 2**). Finally, 17 $\beta$ -estradiol concentrations at PPD30 and PPD90 were significantly higher  
305 than all other primiparous groups ( $p$ 's  $< 0.03$ ), but there were no significant differences between any of  
306 the nulliparous groups (all  $p$ 's  $>0.19$ ). There was also a significant main effect of time ( $p<0.01$ ) but not of  
307 reproductive status ( $p=0.41$ ).

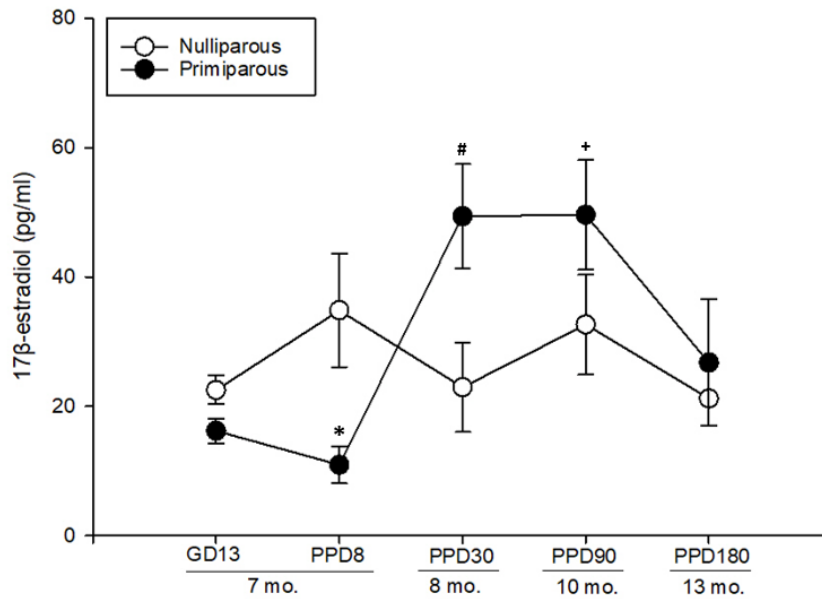

**Figure 2.** Serum concentrations of  $17\beta$ -estradiol at perfusion in primiparous and nulliparous rats. The x-axis represents time relative to gestation and parturition in primiparous rats, and approximate age in months.  $17\beta$ -estradiol was significantly reduced in the early postpartum period at PPD8, but significantly increased in the late postpartum period at PPD30 and PPD90. \* indicates  $p = 0.015$ , significantly lower than age-matched nulliparous rats; # indicates  $p < 0.03$ , significantly higher than 8-month-old nulliparous rats, and primigravid/parous rats at GD13, PPD8, and PPD180; + indicates  $p < 0.03$ , significantly higher than primigravid/parous rats at GD13, PPD8, and PPD180. Data are represented in mean values  $\pm$  SEM. GD= gestation day, PPD= postpartum day.

### 308 **3.2. Parity and age had no significant effect on granule cell layer volume**

309 Granule cell layer volume was not significantly affected by age, parity, or age by parity interaction (all  
310  $p$ 's  $> 0.48$ ), thus all further analyses were performed on the number, rather than density, of Ki67- and  
311 DCX-IR cells.

### 312 **3.3. The number of doublecortin-IR cells was significantly reduced during pregnancy and the** 313 **postpartum period, and declined in middle-age in nulliparous rats only**

314 The number of DCX-IR cells was significantly reduced in primi-gravid and -parous rats relative to age-  
315 matched nulliparous controls at GD13, PPD8, and PPD30 ( $p$ 's  $< 0.001$ ; significant time by reproductive  
316 status interaction;  $F(4, 38) = 6.7213$ ,  $p < 0.001$ ; **Fig. 3**). There were also significant main effects of time  
317 and reproductive status (all  $p$ 's  $< 0.001$ ).

318 There was a significant age-related decline in the number of DCX-IR cells in nulliparous rats,  
319 such that each nulliparous group had a significantly lower number of DCX-IR cells than all previous

320 nulliparous age groups (all  $p$ 's<0.014), with the exception of a non-significant decline from 10 to 13  
 321 months ( $p=0.11$ ; significant time by reproductive status interaction;  $F(4, 38)=6.7213$ ,  $p<0.001$ ; **Fig. 3**).  
 322 There was also a significant decline in DCX-IR cell number in primiparous rats at PPD30 relative to  
 323 GD13 and PPD8 ( $p$ 's<0.017; **Fig. 3**). However, the trajectory of age-related change in DCX-IR cell  
 324 number was significantly altered by parity in middle-age; unlike nulliparous rats, primiparous groups  
 325 had no significant difference in the number of DCX-IR cells from 8 to 10 months of age ( $p=0.10$ ). Based  
 326 on previous findings (Barha et al., 2015; Galea et al., 2018), we expected parity to increase neurogenesis  
 327 in middle age. Indeed, we found a significant increase in DCX-IR cells from 8 to 13 months of age in  
 328 primiparous rats ( $p=0.044$ ; one-tailed).

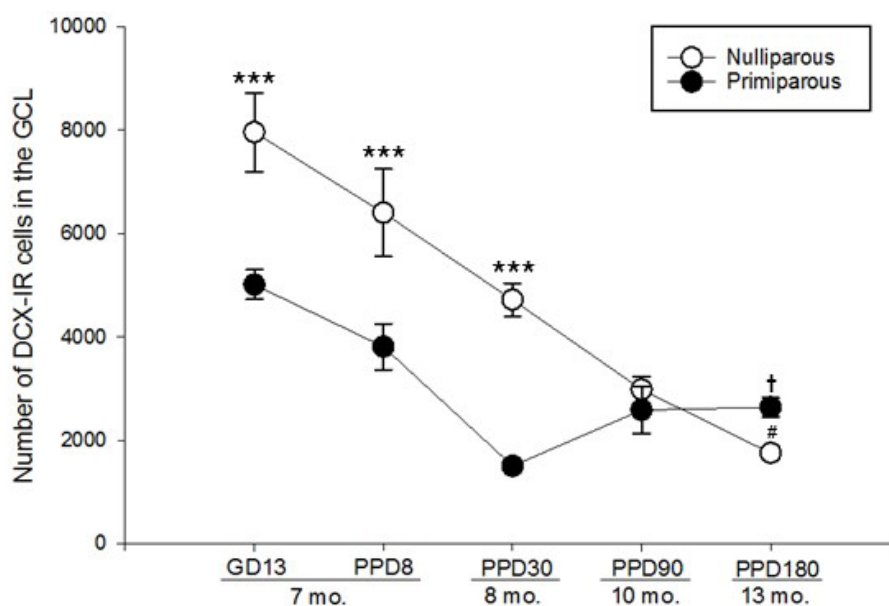

**Figure 3.** Estimated total number of doublecortin (DCX)-immunoreactive (IR) cells in the granule cell layer of primiparous and nulliparous rats across 7-13 months of age. The x-axis represents time relative to gestation and parturition in primiparous groups, and approximate age in months. DCX-IR cell number was significantly reduced in primiparous rats in mid-gestation and until postpartum day 30. Between 8 and 13 months of age, DCX-IR cell number significantly declined in nulliparous rats, but significantly increased in primiparous rats. Data are represented in mean values  $\pm$  standard error of the mean (SEM). GCL= granule cell layer, DCX-IR= doublecortin-immunoreactive, GD= Gestations Day, PPD= Postpartum Day, mo.= approximate age in months. \*\*\* indicates  $p<0.001$ , significantly different from age-matched primiparous group. # denotes  $p<0.001$ , significantly different from 8-month-old nulliparous group. † indicates  $p=0.044$ , significantly different from primiparous rats at PPD30.

### 329 3.4. Parity and age had no significant effect on the maturational stage of DCX-IR cells

330 Regardless of age and reproductive status, the percentage of proliferative DCX-IR cells was  
 331 significantly higher than that of intermediate DCX-IR cells ( $p<0.001$ ), and the percentage of post-mitotic  
 332 DCX-IR cells was significantly higher than that of intermediate and proliferative DCX-IR cells  
 333 ( $p$ 's<0.001; significant main effect of DCX maturational stage,  $F(2, 76)=107.17$ ,  $p<0.001$ ; **Table 2**).

334 There were no other significant main effects, and no significant interactions (all  $p$ 's >0.14).

335 **3.5. Ki67-IR cells declined in mid-gestation and the early postpartum period in primiparous rats,**  
336 **and with age regardless of reproductive status**

337 Parity significantly reduced the number of Ki67-IR cells in the GCL ( $F(1, 38)=9.2681$ ,  $p=0.004$ ;  
338 significant main effect of reproductive status; **Fig. 4A**). Regardless of reproductive status, Ki67-IR cells  
339 declined significantly with age ( $F(4, 38)=16.505$ ,  $p<0.001$ ; main effect of time; **Fig. 4A**), in which there  
340 was a significant difference between all age groups ( $p$ 's < 0.005), with the exception of non-significant  
341 differences from 7 to 7.5 months, 8 to 10 months, and 10 to 13 months ( $p$ 's > 0.05). Although there was  
342 no significant age by parity interaction ( $p=0.13$ ), a priori we expected a decline in cell proliferation in  
343 the early postpartum period based on previous work (Leuner et al., 2007). Planned comparisons revealed  
344 a significant decline in Ki67-IR cells on PPD8 ( $p=0.013$ ; one-tailed), in addition to a significant decline  
345 on GD13 ( $p=0.004$ ), relative to age-matched nulliparous controls in both instances (**Fig. 4A**).

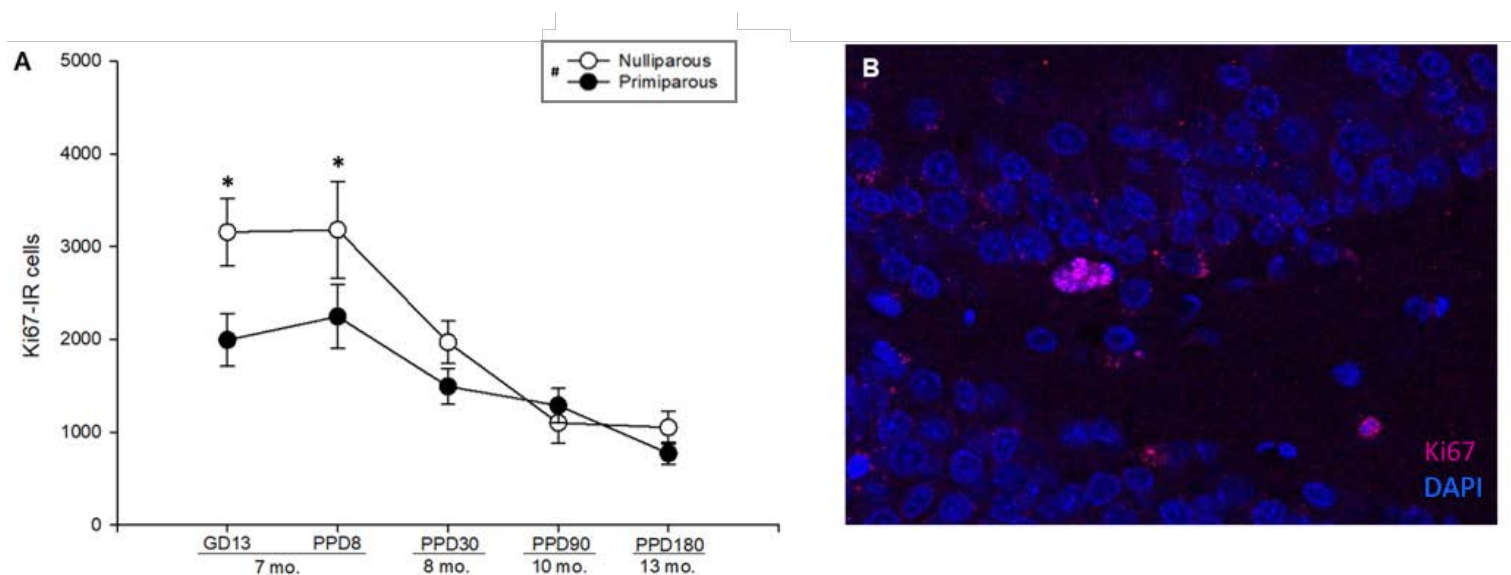

**Figure 4. (A)** Estimated total number of Ki67-immunoreactive (IR) cells in the granule cell layer and subgranular zone of primiparous and nulliparous rats across 7-13 months of age. The x-axis represents time relative to gestation and parturition in primiparous groups, and approximate age in months. Ki67-IR cell number was significantly reduced in primiparous rats in mid-gestation and the early postpartum period, and declined with age regardless of reproductive status. Data are represented in mean values  $\pm$  standard error of the mean (SEM). Ki67-IR = Ki67-immunoreactive, GD= Gestations Day, PPD= Postpartum Day, mo.= approximate age in months. \* indicates  $p<0.014$ , significantly different from age-matched primiparous group. # denotes  $p=0.004$ , significant main effect of reproductive status. **(B)** Representative photomicrograph of the dentate gyrus, showing Ki67-IR cells (pink), counterstained with DAPI (blue).

346 **3.6. Density of Iba-1-IR cells increased in the late postpartum period and fluctuated significantly**  
347 **with age in primiparous but not in nulliparous rats**

348 Because we quantified Iba-1-IR cells in 4 sections per animal, the density of IR cells was analyzed, as  
349 we have done previously (Mahmoud et al., 2016a). Age significantly affected the density of Iba-1-IR  
350 cells in the dentate gyrus, with higher density at 8 and 13 months relative to 7.5 and 10 months of age  
351 ( $p$ 's < 0.02; significant main effect of time,  $F(4, 39) = 3.43$ ,  $p = 0.017$ ). We expected alterations in the  
352 density of Iba-1-IR cells in the postpartum period due to previous findings (Haim et al., 2017). A priori  
353 comparisons show that the density of Iba-1-IR cells fluctuated significantly across time in primiparous  
354 rats; density was increased in the late postpartum period at PPD30 relative to PPD8 ( $p = 0.002$ ), and in  
355 middle-aged rats at PPD180 relative to PPD8 ( $p < 0.003$ ; **Fig. 5A**). On the other hand, density did not  
356 significantly change across age in nulliparous rats (all  $p$ 's > 0.17; **Fig. 5A**). There were no significant  
357 differences between nulliparous and primiparous groups across age (all  $p$ 's > 0.3), except for a trend for  
358 higher density at PPD30 relative to age-matched nulliparous controls ( $p = 0.09$ ; **Fig. 5A**). There was no  
359 significant main effect of reproductive status and no significant interaction ( $p$ 's > 0.28).

360 **3.7. Average length and number of Iba-1-IR cell processes changed significantly with age and**  
361 **reproductive status.**

362 Iba-1-IR cells displayed significantly shorter processes in the early postpartum period at PPD8 relative  
363 to nulliparous controls ( $p = 0.005$ ; **Fig. 5B**), and to primiparous rats at GD13 ( $p < 0.002$ ). There was a  
364 decline in average length of Iba-1-IR cell processes at 10 months of age, relative to 7 months in  
365 primiparous rats, and to 7, 7.5, and 8 months in nulliparous rats (all  $p$ 's < 0.027; significant time by  
366 reproductive status interaction  $F(4, 38) = 4.67$ ,  $p = 0.004$ ; **Fig. 5B**). However, there was no further  
367 significant change in average process length between 10 and 13 months of age, regardless of  
368 reproductive status ( $p$ 's > 0.23). There was also a significant main effect of the covariate serum 17 $\beta$ -  
369 estradiol ( $p = 0.012$ ), a trend towards a significant main effect of time ( $p = 0.067$ ), but no significant main  
370 effect of reproductive status ( $p = 0.42$ ).

371 The average number of Iba-1-IR cell processes increased significantly with age in nulliparous rats,  
372 where significantly more processes were found in 13- compared to 8-month-old rats ( $p < 0.002$ ), but  
373 missed significance compared to 7.5-month-old rats ( $p = 0.027$ ; planned comparisons; **Fig. 5C**). On the  
374 other hand, there were no significant differences in the average number of cell processes between  
375 primiparous rats across age (all  $p$ 's > 0.06). There were trends towards significant main effects of time



376 (p=0.054) and reproductive status (p=0.056) but no significant time by reproductive status interaction  
 377 (p=0.11).

378 There was a trend for primiparity to decreased the soma size of Iba-1-IR cells relative to nulliparity (F(1,  
 379 38)=5.2646, p=0.092; main effect of reproductive status; **Fig. 5D**). While there was no significant age by  
 380 parity interaction (p=0.80), the effects of primiparity to reduce soma size appears to be driven by the  
 381 PPD30, 90, and 180 groups. In addition, there was a significant main effect of time (F(4, 38)=5.28,  
 382 p<0.001).

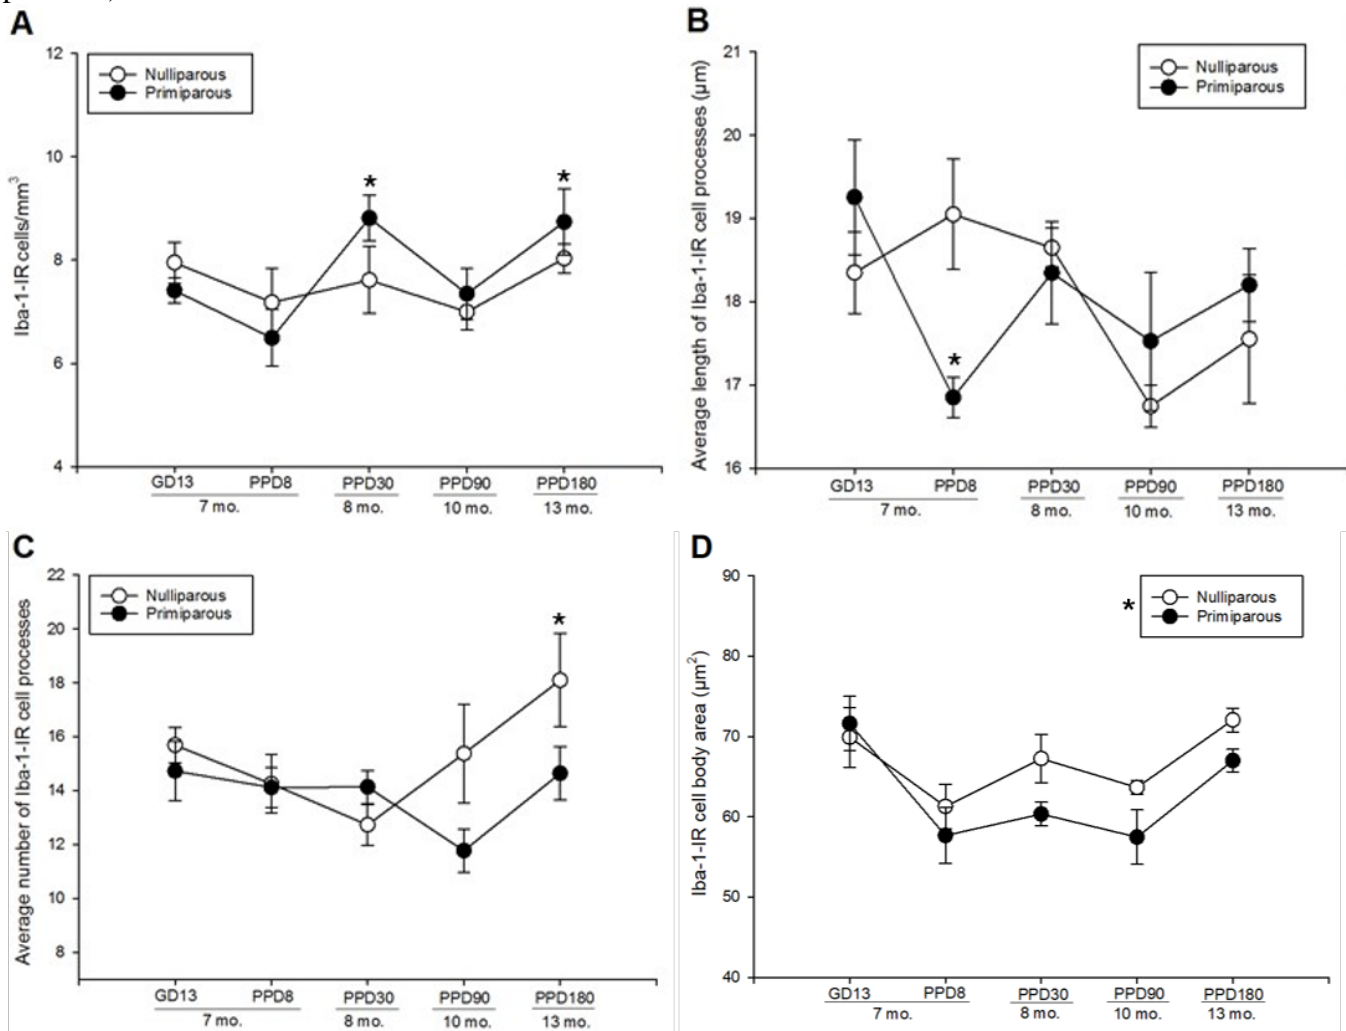

**Figure 5.** Density and morphology of Iba-1-immunoreactive cells in the dentate gyrus of primiparous and nulliparous rats. The x-axis represents time relative to gestation and parturition in primiparous rats, and approximate age in months. (A) Iba-1-IR cell density was stable across age in nulliparous rats, but fluctuated significantly in primiparous rats, with increased density at PPD30 and PPD180, relative to PPD8. \* indicates p<0.003, significantly different from primiparous group at PPD8. (B) Average length of Iba-1-immunoreactive cell processes was reduced at PPD8, and decreased with age regardless of reproductive status. \* denotes p<0.006, significantly different from age-matched nulliparous controls, and from primiparous group at GD13 (C) Average number of Iba-1-immunoreactive cell processes increased significantly with age in nulliparous but not primiparous rats. \* indicates p<0.002, significantly different from 8-month-old nulliparous group. (D) There was a trend towards significance for parity to be reduced soma area of Iba-1-IR cells \* indicates p=0.092, main effect of reproductive status. Data are represented in mean values ± SEM. GD= gestation day, PPD= postpartum day, mo.= age in months, Iba-1-IR= Iba-1-immunoreactive.

383 **3.8. The percentage of Iba-1-IR cells of stout morphology increased, and that of ramified**  
384 **morphology decreased, in the early postpartum period**

385 There was a significant Iba-1 morphology by time by reproductive status interaction ( $F(8, 74)=2.066$ ,  
386  $p=0.05$ ; **Fig.6**), in which the percentage of ramified Iba-1-IR cells was reduced in primiparous rats at  
387 PPD8 relative to age-matched nulliparous controls, primigravid rats at GD13, and primiparous rats at  
388 PPD30 (all  $p$ 's  $<0.02$ ; **Fig. 6A**). In addition, the percentage of stout Iba-1-IR cells was significantly  
389 increased in primiparous rats at PPD8 relative to age-matched nulliparous controls and primigravid rats  
390 at GD13 ( $p$ 's  $<0.007$ ; **Fig.6B**). There were no significant differences in the percentage of amoeboid Iba-  
391 1-IR cells between any of the groups ( $p$ 's  $> 0.05$ ; **Fig.6C**). There was also a significant main effect of  
392 Iba-1 morphology ( $p <0.001$ ), a trend for a significant Iba-1 morphology by time interactions ( $p=0.087$ ),  
393 but no other significant main effects or interactions ( $p$ 's  $> 0.49$ ).

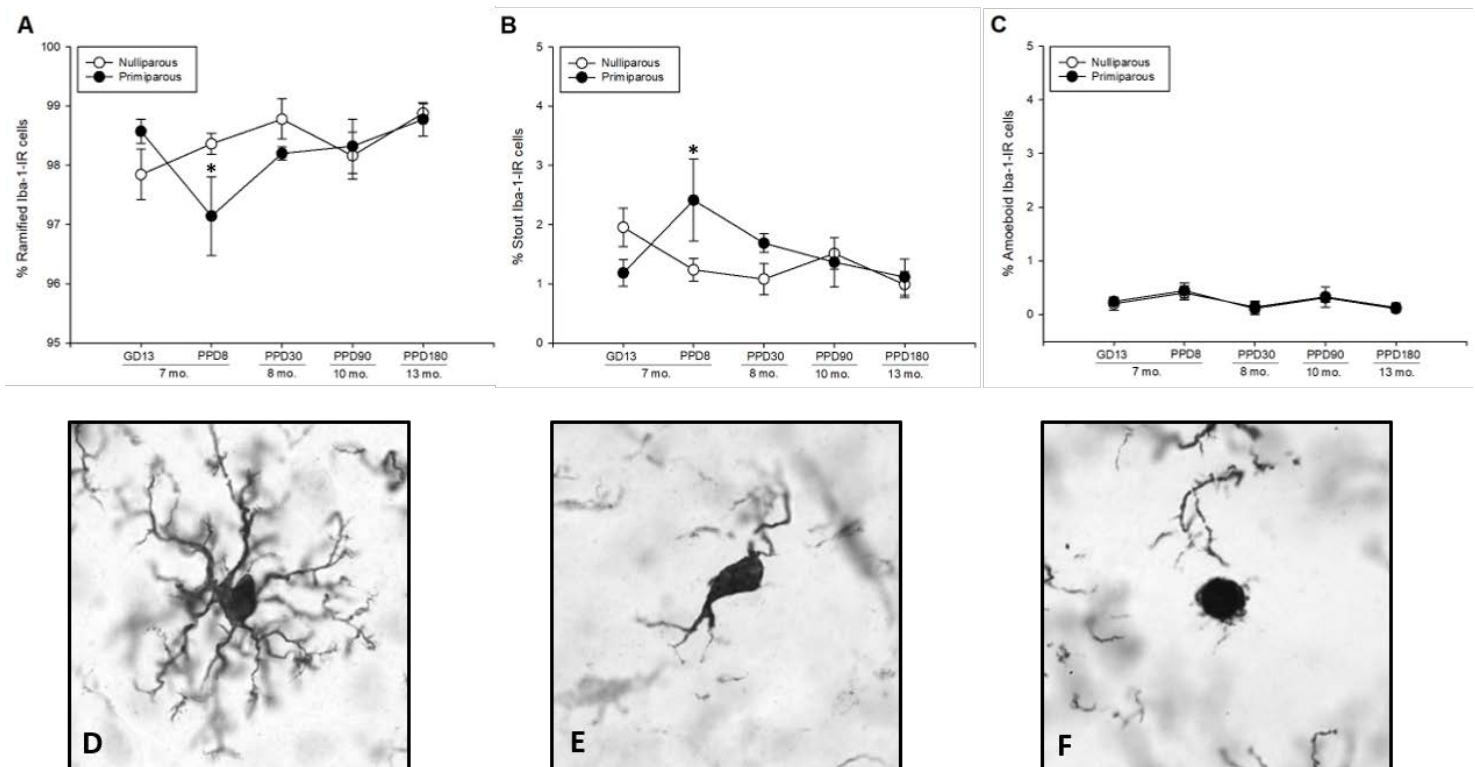

**Figure 6.** Percentage of Iba-1-immunoreactive cells of ramified (A), stout (B), and amoeboid (C) morphology in the dentate gyrus. The x-axis represents time relative to gestation and parturition in primiparous rats, and approximate age in months. (A) the percentage of ramified Iba-1-IR cells was transiently reduced in the early postpartum period. \* indicates  $p <0.02$ , PPD8 significantly lower than 7.5-month-old nulliparous rats, primigravid rats at GD13, and primiparous rats at PPD30. (B) the percentage of stout Iba-1-IR cells was transiently increased in the early postpartum period. \* indicates  $p <0.007$ , PPD8 significantly higher than 7.5-month-old nulliparous rats and primigravid rats at GD13. (C) the percentage of amoeboid Iba-1-IR cells did not differ between groups. Representative photomicrographs of Iba-1-IR cells of ramified (D), stout (E) and amoeboid (F) morphology captured at 60x. Data are represented in mean values  $\pm$  SEM. GD= gestation day, PPD= postpartum day, mo.= age in months, Iba-1-IR= Iba-1-immunoreactive.

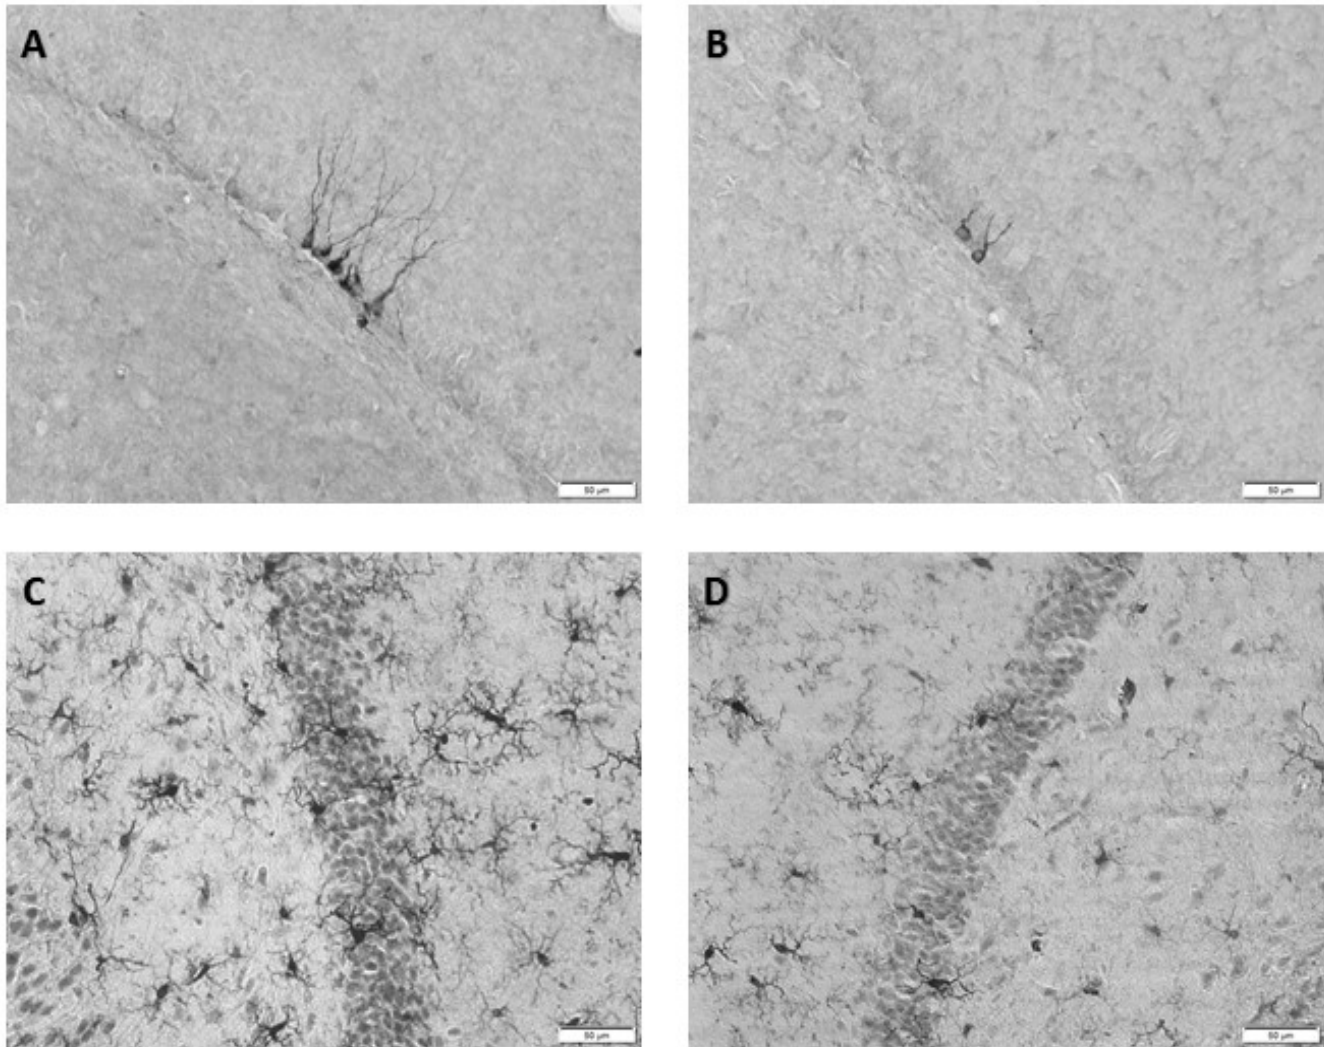

**Figure 7.** Representative photomicrographs of the granule cell layer in the dentate gyrus. **(A)** Doublecortin-immunoreactive cells in an 8-month-old nulliparous rat. **(B)** Doublecortin-immunoreactive cells in an 8-month-old primiparous rat on postpartum day 30. **(C)** Iba-1-immunoreactive cells in a 7.5-month-old nulliparous rat. **(D)** Iba-1-immunoreactive cells in a 7.5-month-old primiparous rat on postpartum day 8.

394 **3.9. Serum IFN- $\gamma$  and IL-10 showed an age-related increase in nulliparous but not primiparous**  
395 **rats.**

396 There was a significant ageing-related increase in IFN- $\gamma$  in nulliparous rats, in which 13-month-old  
397 nulliparous rats had significantly higher IFN- $\gamma$  levels than all other nulliparous groups (all  $p$ 's <0.004;  
398 planned comparisons; **Fig. 8A**). No significant differences were found in IFN- $\gamma$  levels between any  
399 primiparous groups (all  $p$ 's >0.04, non-significant due to Bonferroni correction). Further, at 13 months,  
400 IFN- $\gamma$  levels were higher in nulliparous relative to primiparous rats ( $p = 0.023$ ; **Fig. 8A**). There was also  
401 a significant main effect of time ( $p < 0.001$ ), but not reproductive status ( $p = 0.14$ ) nor an interaction  
402 ( $p = 0.325$ ).

403 Similarly, serum IL-10 increased significantly with age in nulliparous but not primiparous rats;  
 404 significantly higher levels of IL-10 were detected in 13-month old nulliparous rats relative to all other  
 405 nulliparous groups ( $P < 0.002$ ; **Fig. 8B**), but no significant differences were found between any of the  
 406 primiparous groups (all  $p$ 's  $> 0.05$ ; planned comparisons; **Fig. 8B**). There was also a significant main  
 407 effect of time ( $p < 0.003$ ), but not reproductive status ( $p = 0.11$ ) nor an interaction ( $p = 0.45$ ).

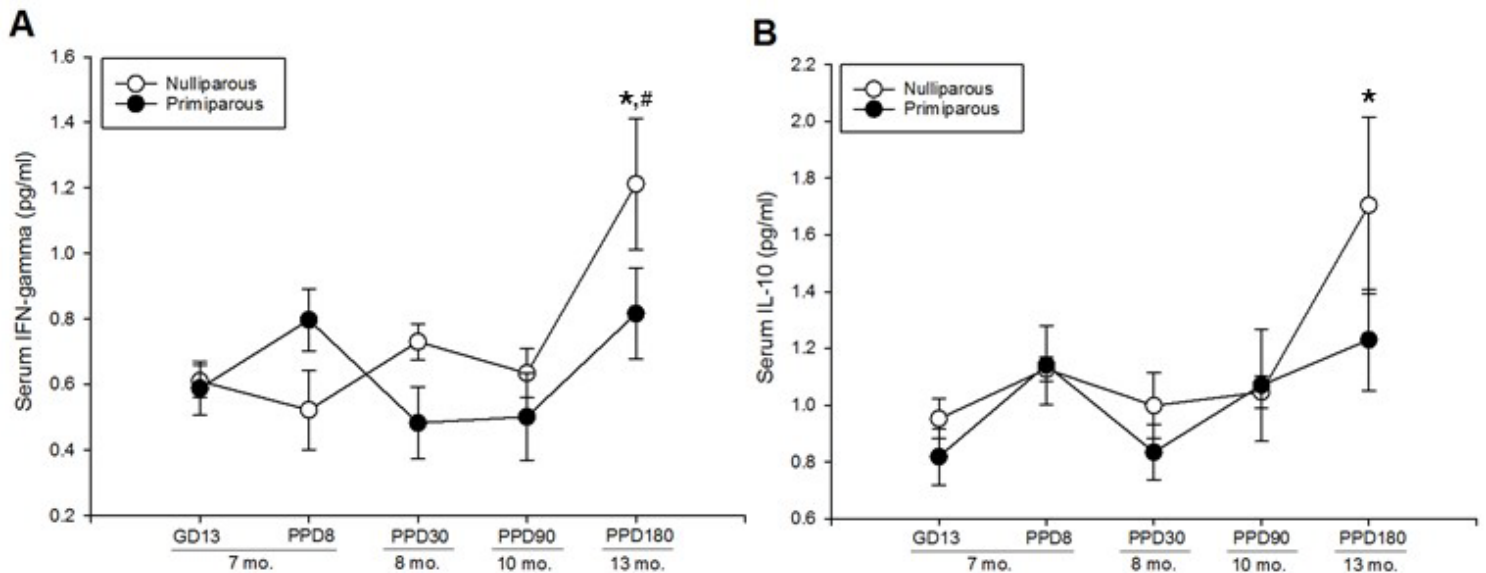

**Figure 8.** Serum levels of interferon- $\gamma$  (**A**) and interleukin-10 (**B**) in primiparous and nulliparous rats. The x-axis represents time relative to gestation and parturition in primiparous groups, and approximate age in months. There was a significant ageing-related increase in IFN- $\gamma$  (**A**) and IL-10 (**B**) in nulliparous but not primiparous rats. \* indicates  $p < 0.004$ , significantly different from all other nulliparous groups. # indicates  $p = 0.023$ , significantly different from 13-month-old primiparous rats. Data are represented in mean values  $\pm$  SEM. IFN- $\gamma$  = interferon gamma, IL-10 = interleukin 10, GD = gestation day, PPD = postpartum day.

### 408 3.10. Serum IL-4 was transiently increased in the early postpartum then persistently reduced by 409 parity

410 Nulliparous rats had higher levels of IL-4 than primiparous rats, regardless of time point (main effect of  
 411 reproductive status:  $F(1, 38) = 7.63$ ,  $p < 0.009$ , **Fig. 9A**). Regardless of reproductive status, there was an  
 412 age-related increase in serum IL-4, with significantly elevated levels at 13 months compared to all  
 413 groups at 8 months of age and younger (all  $p$ 's  $< 0.04$ ; main effect of time:  $F(4, 38) = 4.29$ ,  $p < 0.006$ ).  
 414 There was no significant reproductive status by time interaction ( $F(4, 38) = 1.73$ ,  $p = 0.16$ ), but a priori we  
 415 expected cytokine levels to be altered in the early postpartum period in primiparous rats. Indeed,  
 416 primiparous rats showed a trend for a transient increase in serum IL-4 in the early postpartum period,  
 417 with higher levels at PPD8 relative to GD13 ( $p = 0.029$ ) and PPD30 ( $p = 0.027$ ; a priori comparisons,  
 418 missing significance with correction; **Fig. 9A**). In age-matched nulliparous control groups, serum IL-4  
 419 was not significantly different in 7.5- relative to 7- or 8-month-old rats ( $p$ 's  $> 0.45$ ).

420 **3.11. Serum IL-5 was transiently reduced during gestation and showed an age-related decline in**  
 421 **nulliparous but not primiparous rats.**

422 Serum IL-5 levels were significantly reduced in gestation (GD13), relative to age matched nulliparous  
 423 controls ( $p=0.006$ ; time by reproductive status interaction,  $F(4, 37)=3.31$ ,  $p=0.020$ ; **Fig. 9B**). Further,  
 424 IL-5 levels declined with age in nulliparous animals, as higher levels were detected at 7 months relative  
 425 to 8, 10 and 13 months (all  $p$ 's $<0.02$ ; **Fig. 9B**). Although non-significant, IL-5 levels increased in  
 426 primiparous animals with age, suggesting a reversed pattern of age-related changes in IL-5 compared to  
 427 nulliparous rats. There were no significant main effects of time or reproductive status (all  $p$ 's  $>0.1$ ).

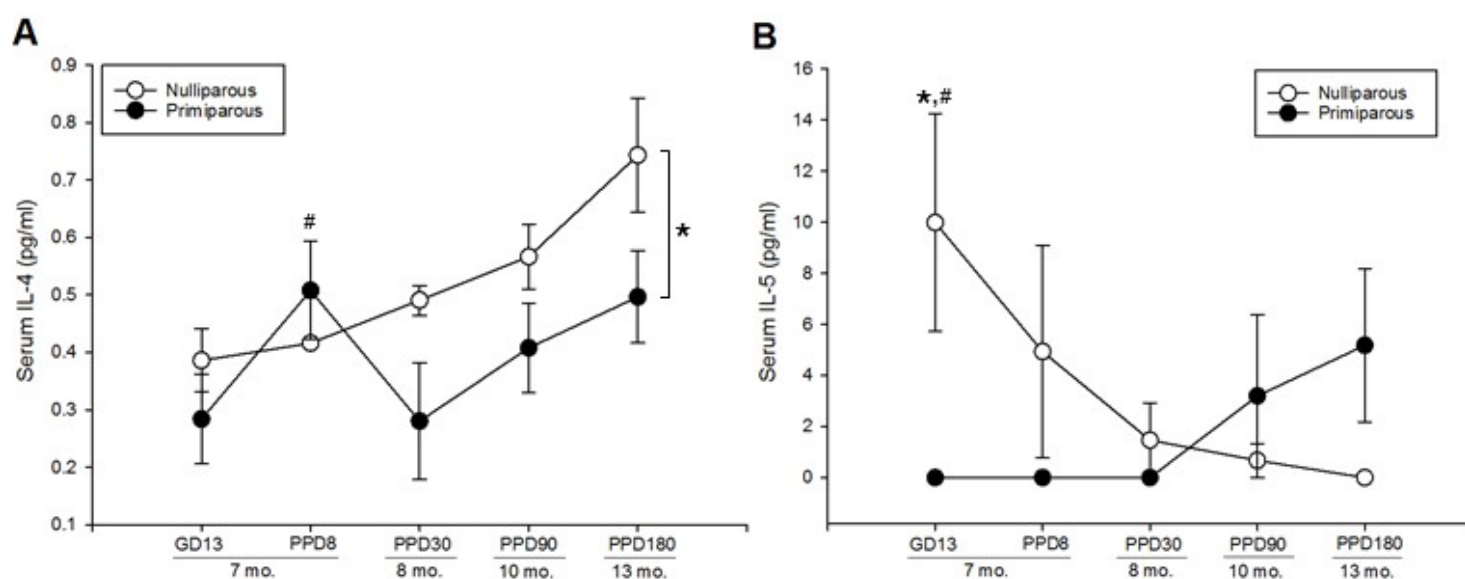

**Figure 9.** Serum levels of interleukin-4 (**A**), and interleukin-5 (**B**) in primiparous and nulliparous rats. The x-axis represents time relative to gestation and parturition in primiparous groups, and approximate age in months. (**A**) Serum IL-4 levels were transiently increased in primiparous rats at PPD8, but persistently suppressed by parity thereafter. # indicates  $p<0.03$ , trend towards significance relative to GD13 and PPD30. \* indicates  $p<0.009$ , main effect of primiparity to reduce IL-4 levels (**B**) Serum IL-5 was transiently blunted during gestation, and a significant age-related decline in serum IL-5 was found only in nulliparous rats. \* indicates  $p=0.006$ , significantly higher than primigravid rats at GD13. # indicates  $p<0.02$ , significantly higher than all nulliparous groups between 8 and 13 months of age.

428 **3.12. Serum IL-13, IL6, CXCL1, IL-1 $\beta$ , and TNF- $\alpha$ , were not significantly altered by parity or age**

429 Regardless of reproductive status, there was a trend towards significance for a main effect of time to  
 430 affect IL-13 ( $F(4, 37)=2.46$ ,  $p=0.06$ ; **Fig. 10A**), where IL-13 levels were elevated at 13 months  
 431 compared to 8 months ( $p<0.002$ ; planned comparisons). There were no significant main effects of

432 reproductive status or 17 $\beta$ -estradiol (covariate), and no time by reproductive status interaction (all p's  
433 >0.4). There were no significant main effects of reproductive status or age, nor an interaction for serum  
434 concentrations of IL-6 (all p's > 0.21, **Fig. 10B**), CXCL1 (all p's >0.40 **Fig. 10C**), or IL-1 $\beta$  (all p's >  
435 0.32, **Fig. 10D**). There were trends towards significance for a main effect of parity to increase TNF- $\alpha$  (p  
436 = 0.064) and a main effect of time (p = 0.061) for TNF- $\alpha$  to decline with age, but no significant  
437 reproductive status by time interaction (p = 0.72. **Fig. 10E**).

### 438 **3.13. Principal Component Analysis of serum cytokines**

439 The model generated 4 principal components, which accounted for 82.6% of the variance within the  
440 dataset, with the first principal component explaining 40.4% of the variance, the second 18.2%, the third  
441 12.6%, and the fourth 11.4%. Interestingly, IFN- $\gamma$ , IL-10, IL-13, and IL-4 loaded heavily onto Principal  
442 Component 1 (PC1; see **Table 3**). These same cytokines also showed the most robust alterations with  
443 parity and age with ANOVA, therefore the PCA ultimately verified our individual ANOVA analyses.  
444 Subsequently, we analyzed PC1 scores using ANOVA, which revealed a main effect of time (F(4,  
445 37)=3.78, p=0.011; **Fig. 10F**), with higher scores at 13 months of age relative to all other age groups (all  
446 p's <0.033). Planned comparisons reveal a more robust age-related increase in PC1 scores in nulliparous  
447 rats, with higher scores in 13- relative to 7- and 8-month-old rats (p's<0.007). In contrast, there were no  
448 significant differences in PC1 scores between any primiparous groups (p's>0.038; non-significant due to  
449 Bonferroni correction). There was no significant main effect of reproductive status, nor an interaction  
450 (p's >0.11). Interestingly, the pattern observed here is akin to the age-related increase in IL-10, IFN-  $\gamma$ ,  
451 and IL-4 in nulliparous rats, obtained with individual ANOVA analyses. Further, IL-6 and TNF- $\alpha$  loaded  
452 heavily onto PC2, and IL-1 $\beta$  and IL-5 loaded heavily onto PC3 and PC4, respectively (Table 1).

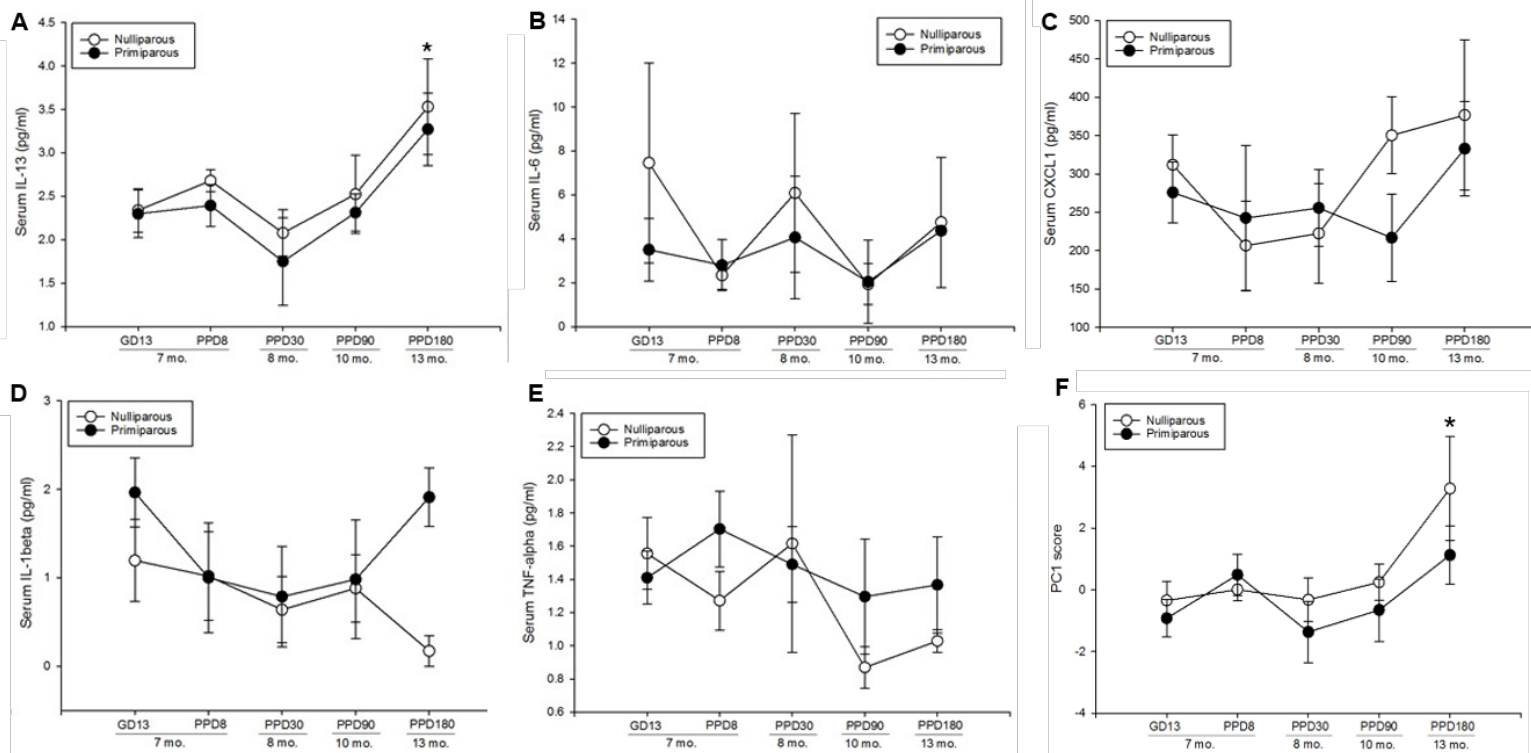

**Figure 10.** Serum concentrations of interleukin-13 (A), interleukin-6 (B), CXCL1 (C), interleukin- $\beta$  (D), and tumor necrosis factor alpha- $\alpha$  (E) in primiparous and nulliparous rats. The x-axis represents time relative to gestation and parturition in primiparous rats, and approximate age in months. (A) There was a trend towards significance for serum IL-13 to increase with age regardless of reproductive status. \* indicates  $p < 0.002$  significantly different from 8-month old rats. Reproductive status and age had no significant effects on serum levels of interleukin-6 (B), CXCL1 (C), and interleukin- $\beta$  (D). (E) There were trends towards significance for parity to increase ( $p = 0.064$ ) and for age to decrease ( $p = 0.061$ ), TNF- $\alpha$  concentrations. (F) Principal Component 1 scores in primiparous and nulliparous rats, \* indicates  $p$ 's < 0.007, significantly higher PC1 scores in 13- relative to 7- and 8-month-old nulliparous rats. Data are represented in mean values  $\pm$  SEM. GD= gestation day, PPD= postpartum day. Data are represented in mean values  $\pm$  SEM. IL-4= interleukin-4; IL-5 = interleukin-5; IL-13 = interleukin-13; GD= gestation day; PPD = postpartum day; mo.= age in months.

### 453 3.14. Reproductive status influenced the direction and magnitude of correlations between microglia 454 and neurogenesis measures

455 Previous studies indicate that microglia play a role in adult hippocampal neurogenesis under baseline and  
456 inflammatory conditions (Ekdahl et al., 2003; Monje, 2003; Sierra et al., 2010). However, the role of  
457 microglia in motherhood-associated neurogenic changes have not been studied, thus, to indirectly examine  
458 this we correlated our measures of neurogenesis and microglia. Increased average length of processes was  
459 significantly correlated with a higher number of Ki67-IR cells in nulliparous ( $r = 0.58$ ,  $p = 0.005$ ; **Fig.**  
460 **11A**), but not primiparous rats ( $r = 0.089$ ,  $p = 0.67$ ), and these correlations were significantly different ( $z$   
461  $= 1.81$ ,  $p = 0.035$ ). Similarly, increased average length of processes was significantly correlated with a

462 higher number of DCX-IR cells in nulliparous ( $r = 0.62$ ,  $p = 0.002$ ; **Fig. 11B**), but not primiparous rats ( $r$   
463  $= 0.11$ ,  $p = 0.60$ ; **Fig. 11B**), and these correlations were significantly different ( $z = 1.96$ ,  $p = 0.025$ ).  
464 Interestingly, increased Ki-67-IR cell number was significantly associated with more DCX-IR cells in  
465 nulliparous rats ( $r = 0.86$ ,  $p < 0.001$ ; **Fig. 11C**), but not in primiparous rats ( $r = 0.30$ ,  $p = 0.15$ ; **Fig. 11C**),  
466 and the difference between the correlations was significant ( $z = 3.04$ ,  $p = 0.001$ ).

### 467 **3.15. Reproductive status influenced the direction and magnitude of the correlations between** 468 **circulating cytokine concentrations and neural measures**

469 Peripheral cytokine signals propagate to the brain and can influence neuroimmune function (Miller et  
470 al., 2014; Quan and Banks, 2007), thus we examined correlations between serum cytokine levels and  
471 microglial measures to assess whether central and peripheral inflammatory indicators are associated in  
472 parous and non-parous rats. Interestingly, in primiparous rats, the average length of Iba-1-IR cell  
473 processes was negatively correlated with serum IL-10 ( $r = -0.56$ ,  $p = 0.005$ ; **Fig. 11D**), and IL-4 ( $r = -$   
474  $0.6$ ,  $p = 0.002$ ; **Fig. 11E**). On the other hand, length of cell processes was not significantly correlated  
475 with IL-10, or IL-4 in nulliparous rats (all  $p$ 's  $> 0.36$ ). These correlations were significantly different  
476 between reproductive status groups for IL-10 ( $z = 2.13$ ,  $p = 0.017$ ), but not for IL-4 ( $p = 0.054$ ).

477 Regardless of reproductive status, no other significant correlations were found between length of Iba-1-  
478 IR cell processes and all other measured cytokines (all  $p$ 's  $> 0.056$ ; all trends towards significance  
479 appear in primiparous groups only). Further, there were no significant correlations between any of the  
480 cytokines and Iba-1-IR cell density, regardless of reproductive status (all  $p$ 's  $> 0.23$ ).

481 In nulliparous rats, increased serum concentrations of IL-4 were associated with fewer DCX-IR and Ki67-  
482 IR cells (Ki67:  $-0.57$ ,  $p = 0.006$ ; **Fig. 11F**; and DCX:  $r = -0.70$ ,  $p < 0.001$ ; **Fig. 11G**). There were no  
483 significant correlations between any cytokines and Ki67- or DCX-IR cells in primiparous rats (all  $p$ 's  $>$   
484  $0.19$ ). These correlations were significantly different between reproductive status groups in both instances  
485 (DCX:  $z = -2.58$ ,  $p < 0.005$ ; Ki67:  $z = -1.82$ ,  $p = 0.034$ ).

### 486 **3.16. Serum 17 $\beta$ -estradiol concentrations were not significantly correlated with hippocampal cell** 487 **proliferation, Iba-1 measures, or serum cytokine concentrations**

488 Serum 17 $\beta$ -estradiol concentration were not significantly associated with Ki67 expression in primiparous  
489 or nulliparous rats ( $p$ 's  $> 0.1$ ). Regardless of reproductive status, there were also no significant correlations  
490 between 17 $\beta$ -estradiol concentrations and any measure of Iba-1-IR cells (density, cell body size, average  
491 length and number of processes; all  $p$ 's  $> 0.1$ ), or any of the cytokine concentrations (all  $p$ 's  $> 0.17$ ).



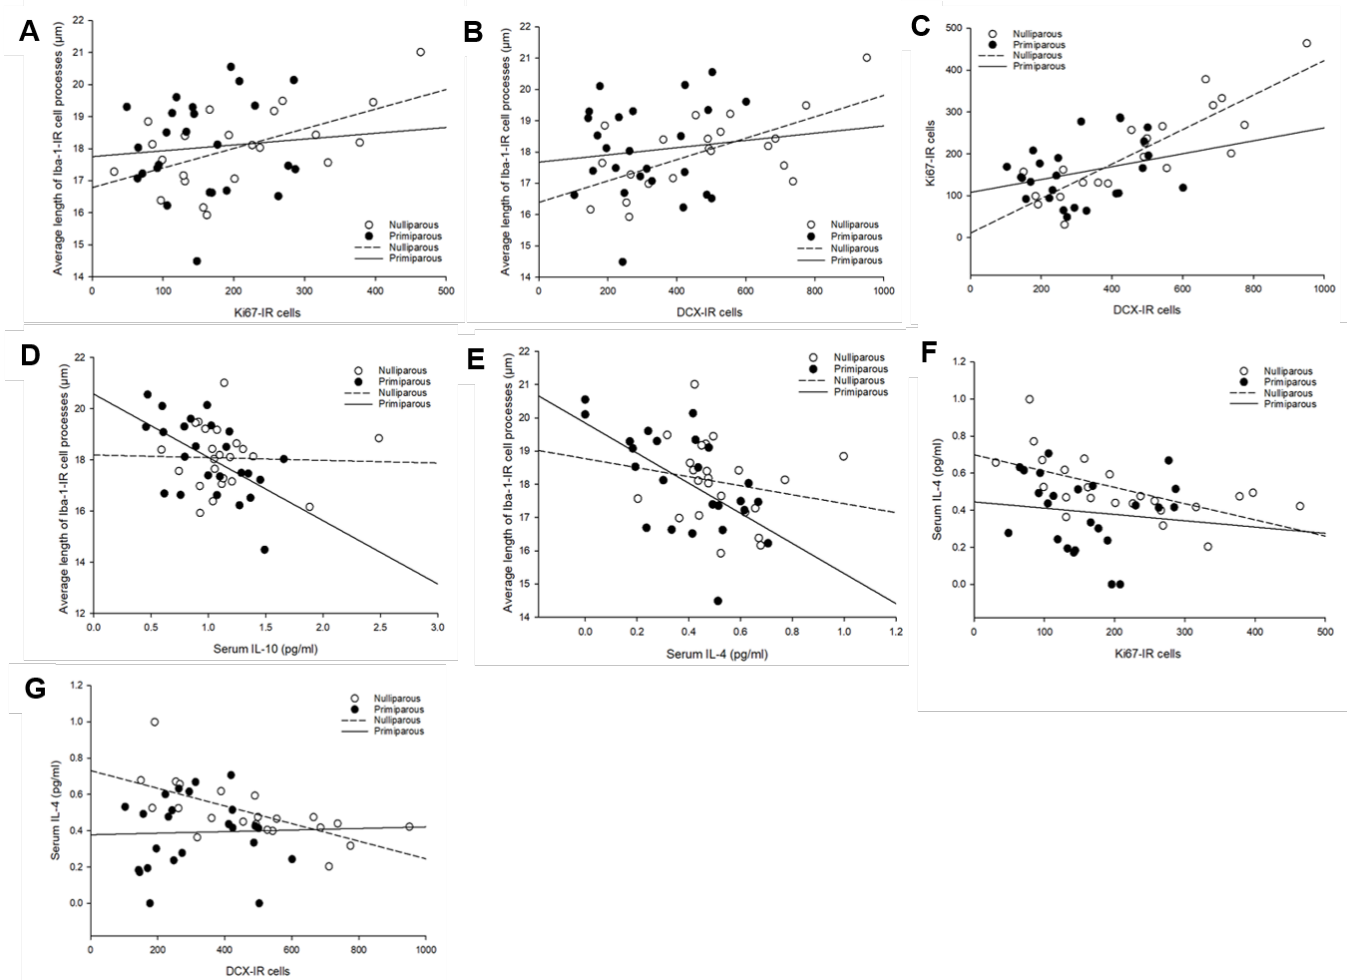

**Figure 11.** Correlations between dependent variables of interest. Increased average length of Iba-1-immunoreactive (IR) cell processes was associated with higher Ki67 (A) and doublecortin (DCX; B) expression in nulliparous rats only. KI67-IR cell number was significantly and positively correlated with DCX-IR cell number in nulliparous rats only (C). Elevated serum concentrations of IL-10 (D), and IL-4 (E) were significantly associated with shorter average Iba-1-IR cell processes in primiparous rats only. In nulliparous rats only, increased Ki67-IR (F) and DCX-IR (G) cell number was significantly associated with lower serum IL-4.

#### 492 4. Discussion

493 Here, we report short- and long-term effects of maternal experience on hippocampal neurogenesis,  
 494 microglial density and morphology in the dentate gyrus, and circulating cytokine levels, culminating six  
 495 months after parturition. We found that adult hippocampal neurogenesis was suppressed in mid-  
 496 gestation and up to one month postpartum. Interestingly, the ageing trajectory of neurogenesis was  
 497 modulated by reproductive experience, as neurogenesis levels declined from 7 to 13 months of age in  
 498 nulliparous rats, but showed a slight increase in primiparous rats across the same period. Hippocampal  
 499 cell proliferation was suppressed in mid-gestation and the early postpartum period in primiparous rats,

500 but normalized thereafter, as an age-related decline in cell proliferation was observed regardless of  
501 previous parity. Further, microglia in the dentate gyrus displayed a more activated morphology in the  
502 early postpartum period, followed by a transient increase in microglial density in the later postpartum  
503 period and overall smaller microglia soma size in primiparous compared to nulliparous rats. We found  
504 alterations in circulating cytokine levels during pregnancy and the early postpartum period, and more  
505 intriguingly, we show that the age-related changes in circulating cytokine levels were dependent on  
506 parity. We also observed that reproductive status shifted the associations between microglia and  
507 neurogenesis, with average length of Iba-1-IR cell processes being positively associated with  
508 neurogenesis in nulliparous but not primiparous. Further, parity modulated the correlations between  
509 serum cytokines and microglial morphology, and between serum cytokines and neurogenesis levels.  
510 These correlations suggest that the relationships between immune processes and neurogenesis may be  
511 modified with parity. Lastly,  $17\beta$ -estradiol concentrations were reduced in the early postpartum period  
512 (PPD8) and in mid-gestation (GD13), in line with previous findings (Rosenblatt et al., 1988). Beyond  
513 the expected pregnancy and postpartum changes in circulating  $17\beta$ -estradiol, we found that  
514 concentrations were not significant moderators of most variables, including hippocampal cell  
515 proliferation, microglial density and morphology, and cytokine concentrations. Collectively our data  
516 suggest that maternal experience has transient and delayed effects on hippocampal neurogenesis,  
517 microglia, and the peripheral inflammatory milieu.

#### 518 **4.1. Adult hippocampal neurogenesis was suppressed during gestation and the postpartum period**

519 We report that adult hippocampal neurogenesis, measured via the expression of doublecortin, was  
520 suppressed beginning in mid-gestation in primigravid rats. Few studies to date have examined the  
521 survival of new cells in the maternal hippocampus during gestation (Pawluski et al., 2010; Rolls et al.,  
522 2008). Our findings are, however, consistent with a study that found suppressed neurogenesis in  
523 pregnant mice during mid- and late-gestation (Rolls et al., 2008). In contrast, the expression of PSA-  
524 NCAM was increased in the dentate gyrus of pregnant rats at GD18 (Banar et al., 2001), indicating a  
525 potential increase in neurogenesis, as PSA-NCAM is expressed on newly generated and migrating  
526 neurons (Rutishauser, 2008). However, because PSA-NCAM is also expressed on neurons undergoing  
527 other forms of plasticity (Rutishauser, 2008), its expression provides limited and non-specific  
528 information regarding neurogenesis levels. Another study in rats found that the survival of cells  
529 produced on gestation day 1 was not significantly altered when examined across gestation (Pawluski et  
530 al., 2010), partially contrasting with our current findings. Importantly, however, DCX is expressed in  
531 immature neurons between 2 hours and 21 days after production (Brown et al., 2003). Therefore, our

532 current data provide information on the population of cells produced as early as 8 days prior to  
533 impregnation, and as late as the day of euthanasia (GD13). Therefore, inconsistencies between the two  
534 studies are not surprising, considering that the cell populations examined were produced under different  
535 conditions. We also observe a concurrent reduction in cell proliferation on GD13 indicating that this  
536 may underlie the decline in immature neurons at this time. Although no prior studies have examined  
537 cell proliferation in mid-gestation, cell proliferation was not altered on GD1 (Pawluski et al., 2010),  
538 GD7 (Shingo et al., 2003), or GD21 (Furuta and Bridges, 2005). Therefore, a more detailed time-course  
539 analysis of hippocampal plasticity during pregnancy is warranted.

540 Consistent with a prior study (Workman et al., 2015), we also found reduced DCX expression in  
541 the postpartum period, evident until PPD30. This finding is also in keeping with past work showing  
542 reduced survival in new cells labelled on PPD2 and examined 21 days later (Pawluski and Galea, 2007),  
543 and in new cells labelled in mid-gestation (GD11-12) and examined 14 days later, in the early postpartum  
544 period (Rolls et al., 2008). We found reductions in hippocampal cell proliferation in the early postpartum  
545 period, which normalized by PPD30, in line with previous data (Darnaudéry et al., 2007; Leuner et al.,  
546 2007; Pawluski and Galea, 2007; Rolls et al., 2008). Thus, the suppression in immature neurons found at  
547 PPD8 likely resulted from a reduction in both cell proliferation and survival, whereas the suppression at  
548 PPD30 is likely due to decreased cell survival rather than proliferation. Although the functional  
549 significance is not known, suppressed neurogenesis in the maternal brain may be mechanistically  
550 associated with the enhanced susceptibility to mood disorders in the peripartum period (Hendrick et al.,  
551 1998). Further, separate lines of evidence indicate that adult neurogenesis is involved in hippocampal  
552 regulation of the HPA axis at least in males (Schloesser et al., 2009; Snyder et al., 2011), and that the HPA  
553 axis undergoes substantial adaptations during pregnancy and the postpartum (De Weerth and Buitelaar,  
554 2005; Lightman et al., 2001; Slattery and Neumann, 2008). Therefore, reductions in neurogenesis in the  
555 maternal hippocampus could influence HPA axis function. Suppressed neurogenesis may also be linked  
556 to deficits in hippocampus-dependent learning and memory reported in late pregnancy and the early  
557 postpartum period (reviewed in (Workman et al., 2012)).

#### 558 **4.2. Maternal experience altered the trajectory of age-related changes in hippocampal neurogenesis**

559 Between 8 and 13 months of age, immature neurons in the dentate gyrus declined significantly in  
560 nulliparous rats but showed a slight increase in primiparous rats. We observe an age-related decline in  
561 cell proliferation (Ki67-IR cells) regardless of reproductive status, suggesting that the differential effects  
562 in immature neurons (DCX-IR cells) are driven by differences in cell survival. Previous work indicates

563 that hippocampal neurogenesis steadily declines with age, with the most substantial decline occurring  
564 between adulthood and middle age in female rats (Driscoll et al., 2006; Kuhn et al., 1996; Nacher et al.,  
565 2003), consistent with our current data from nulliparous rats. Thus, the increase in neurogenesis levels in  
566 middle-aged primiparous rats suggests that reproductive experience can modify the trajectory of age-  
567 related alterations in neurogenesis. Alternatively, it may also be reasonable to interpret this finding as  
568 merely a normalization of neurogenesis to nulliparous levels. However, two previous reports indicate  
569 higher neurogenesis levels in primiparous and multiparous relative to nulliparous middle-aged rats  
570 (Barha et al., 2015; Galea et al., 2018), and as such an altered aging trajectory is conceivable. It is  
571 possible that a more robust difference in neurogenesis levels would arise only after multiple  
572 reproductive experiences or later into middle age. There is emerging evidence from human and rodent  
573 studies suggesting that motherhood can alter the course of age-related cognitive decline (Beeri et al.,  
574 2009; Colucci et al., 2006; Cui et al., 2014; Gatewood et al., 2005). For example, reproductive  
575 experience mitigated the age-related decline in spatial memory in rats (Gatewood et al., 2005) and mice  
576 (Cui et al., 2014). Other studies indicate that parity is associated with cognitive impairment in the ageing  
577 female (Beeri et al., 2009; Colucci et al., 2006). These inconsistencies may be reconciled by more  
578 complex interactions with genetic factors that have been associated with pathological cognitive ageing  
579 (Corbo et al., 2007; Cui et al., 2014). While speculative, the modest increase in hippocampal  
580 neurogenesis in middle-aged primiparous rats may be associated with enhanced hippocampus-dependent  
581 cognition that is seen at that time.

582 Interestingly, we observed differences in the relationship between levels of cell proliferation and  
583 immature neurons depending on reproductive status, such that a significant positive correlation between  
584 the two measures was only seen in nulliparous rats. In addition, increased IL-4 concentrations were  
585 associated with reduced proliferation and immature neurons in the hippocampus of nulliparous but not  
586 primiparous rats. Previous work points to a role of IL-4 in the regulation of cell proliferation under  
587 conditions of neurodegeneration (Bhattarai et al., 2016), therefore our findings suggest that this role may  
588 be altered by parity. These relationships should be further investigated, as they appear when  
589 reproductive status groups are collapsed across age, but nonetheless indicate that parity may modulate  
590 the effects of immune signaling on hippocampal neurogenesis.

### 591 **4.3. Microglia assumed a de-ramified morphology in the early postpartum period**

592 Microglia display a predominantly ramified morphology under basal conditions, and de-ramification is  
593 thought to be indicative of increased classical activation under inflammatory conditions (Luo and Chen,

594 2012). Here, we show that microglia in the dentate gyrus exhibited significantly shortened processes at 8  
595 days postpartum, suggesting an increase in microglial activation in the early postpartum period. This de-  
596 ramification was a transient morphological modification as the average length of processes was not  
597 significantly different from nulliparous controls by PPD30. We further show a small but significant shift  
598 in the percentages of microglia assuming different morphological states at PPD8. Specifically, we  
599 observe a reduction in ramified morphology and an increase in stout morphology, which in tandem with  
600 our data on length of processes indicates a shift towards classical microglial activation in the dentate  
601 gyrus in the early postpartum period. However, we interpret these findings with caution, as the  
602 information that can be deduced from morphological phenotype about functional states is limited (Boche  
603 et al., 2013).  $17\beta$ -estradiol concentrations significantly moderated the average length of microglial  
604 processes, suggesting that the observed de-ramification at PPD8 might be moderated by postpartum  
605 reductions in estradiol. However, as this measure of estradiol concentrations provides information about  
606 a small window of time around perfusion, a complete picture of the role of estradiol cannot be  
607 extrapolated from the current study. Future studies should also consider the role of other hormones,  
608 including progesterone and corticosterone, in motherhood-associated changes microglia.

609 To our knowledge, only two studies to date have examined microglia in the maternal brain (Haim  
610 et al., 2017; Posillico and Schwarz, 2016), with findings partially consistent with our current data. Haim  
611 et al. (2017) reported a decrease in the number of microglia with a ramified morphology on postpartum  
612 day 8, in several regions including the dorsal hippocampus. This is in line with our current report of  
613 microglial de-ramification and a shift in percentages of morphological states in the dentate gyrus on the  
614 same postpartum day (PPD8). In the current study, we found an increase in the density of microglia in  
615 the dorsal and ventral dentate gyrus at PPD30, but no alteration in density during gestation or the early  
616 postpartum period. While no other studies have examined microglia in the maternal brain as late as 30  
617 days postpartum, our finding that microglial density in the hippocampus remains unchanged during  
618 gestation and the early postpartum period contrasts previous reports (Haim et al., 2017; Posillico and  
619 Schwarz, 2016). These previous studies found reduced microglial density in several brain regions from  
620 late gestation to the early postpartum (GD20, and PPD1, 8, and 21: Haim et al., 2017; PPD0: Posillico  
621 and Schwarz, 2016). Further, Haim and colleagues (2017) found that microglial density normalized to  
622 nulliparous control levels by PPD21 in all regions examined except the dorsal hippocampus. It appears,  
623 however, that the inconsistencies in findings may be accounted for by differences in microglial densities  
624 within sub-regions of the dentate gyrus, or by methodological differences related to density  
625 measurement. For example, Haim et al. (2017) examined Iba-1 density within the dorsal dentate gyrus

626 only, whereas we included samples from both the dorsal and ventral dentate gyrus. In addition, as we  
627 were primarily interested in the neurogenic niche, we quantified Iba-1-IR cells within the GCL, the  
628 SGZ, and a thin band of the ML, whereas Haim and colleagues did not specify sub-regions within the  
629 dentate gyrus. Finally, Haim et al (2017) utilized optical density, whereas density here was defined as  
630 the number of cells per volume of dentate gyrus. Interestingly, the increase in microglial density that we  
631 find at PPD30 coincides with a return to normalized microglial morphology. We speculate that this may  
632 represent a resolution from the pro-inflammatory state at PPD8. Overall, our novel data provide an  
633 important addition to the literature indicating that pregnancy-related immune adaptations are not limited  
634 to the periphery, but also exist in the brain. More specifically, our data indicate the existence of a pro-  
635 inflammatory hippocampal environment in the early postpartum period. Importantly, increased  
636 microglial activation may be central to the pathophysiology of depression (Kreisel et al., 2014; Miller  
637 and Raison, 2015; Setiawan et al., 2015), thus it is conceivable that similar processes are implicated in  
638 postpartum depression. Our current findings which point to an increase in microglial activation in the  
639 early postpartum may represent a neural mechanism of enhanced susceptibility to mood disorders at that  
640 time, however additional work would be required to directly test this.

641 The effects of parity on microglial morphology were not limited to the early postpartum period.  
642 Specifically, although the number of microglial cell processes increased significantly with age in  
643 nulliparous rats, this effect was prevented by parity. Further, parity reduced microglial soma size, an  
644 effect which appears to emerge at PPD30 onwards. The functional significance of these alterations  
645 cannot be determined from the current study, but as increased microglial soma size is indicative of  
646 classical activation, it is possible that parity may dampen microglial activation in the ageing brain. To  
647 gain better insight into the functional significance of these changes, future studies should investigate  
648 how previous parity may impact microglial structure and function in the ageing brain in response to an  
649 immune challenge.

650 Interestingly, we found that reproductive status affected the associations between microglia and  
651 neurogenesis in the hippocampus. Specifically, increased cell proliferation and immature neurons were  
652 significantly associated with more ramified microglial morphology in nulliparous rats only. On the other  
653 hand, increased cell proliferation and immature neurons were associated with higher microglial density  
654 in primiparous rats only. These observations suggest that the neuroimmune regulation of adult  
655 hippocampal neurogenesis is affected by reproductive status. Importantly, in addition phagocytic activity  
656 during development and disease, microglia are important players in the regulation of adult hippocampal  
657 neurogenesis, where they phagocytose apoptotic new cells, while maintaining ramified morphology and

658 a non-inflammatory environment (Sierra et al., 2010). Thus, future research should directly examine the  
659 possibilities of microglial phagocytosis in the regulation of neurogenesis during pregnancy and the  
660 postpartum period.

#### 661 **4.5. Maternal experience modifies the age-related changes in circulating cytokine levels**

662 In addition to expected cytokine alterations during pregnancy and the early postpartum period (Holtan et  
663 al., 2015; Shimaoka et al., 2000), we observed both persistent and delayed effects of reproductive  
664 experience on the circulating cytokine profile. Specifically, after an initial increase at PPD8, IL-4 levels  
665 were persistently blunted in primiparous rats relative to nulliparous controls. Further, in nulliparous but  
666 not primiparous rats, IFN- $\gamma$  and IL-10 increased and IL-5 declined significantly with age. Adaptations to  
667 the immune systems during pregnancy and the early postpartum period are well established (PrabhuDas  
668 et al., 2015). On the other hand, little attention has been paid to potential long-term effects of  
669 motherhood on the immune system. To our knowledge, only a few studies have examined the effect of  
670 parity on immune systems in aged female mice and one in aged rats. Together these studies suggested  
671 that parity may delay certain indicators of immune senescence, as they relate to alterations in cytokine  
672 production *in vitro* from activated spleen cells (Barrat et al., 1997a), and the distribution of immune cell  
673 populations in the spleen (Barrat et al., 1997b), and bone marrow (Barrat et al., 1999). Another study  
674 from our laboratory found a trend for increased serum levels of IL-6 in primiparous compared to  
675 nulliparous rats at 15 months of age (Galea et al., 2018). Here, we report that a single reproductive  
676 experience alters serum cytokine levels when examined in middle age, up to six months after the  
677 reproductive event.

678 Importantly, peripheral cytokines can affect brain function, as they can access the central nervous  
679 system through various mechanisms, including active and passive transport, and the activation of  
680 cytokine receptors on afferent nerve fibers (reviewed in Miller et al., 2014; Quan and Banks, 2007).  
681 Thus, the effects of parity to modify age-related changes in peripheral cytokines may have ramifications  
682 for the ageing brain in general, and more specifically the hippocampus, as it contains one of the highest  
683 densities of proinflammatory cytokine receptors in the brain (reviewed in Loftis et al., 2010).  
684 Inflammation is a core characteristic of the ageing processes, and the pro-inflammatory cytokine IFN- $\gamma$   
685 increases with age (Oxenkrug, 2011; Rodríguez et al., 2007). Thus, our current data suggest that parity  
686 may prevent or delay at least certain aspects of ageing-related inflammation. Interestingly, from PPD30  
687 onwards, we observed a sustained suppression in serum IL-4 in primiparous rats relative to nulliparous  
688 controls. Traditionally considered an anti-inflammatory cytokine (Hart et al., 1989), elevated IL-4 in

689 nulliparous rats may be suggestive of a compensatory response to attenuate a pro-inflammatory state that  
690 is indicated by elevated IFN-  $\gamma$ . However, IL-4 is pleiotropic (Milner et al., 2010), and as such also can  
691 have pro-inflammatory properties. For example, sustained exposure to elevated levels of IL-4 was  
692 associated with increased inflammation (Milner et al., 2010). The same study found prolonged IL-4  
693 exposure to be associated specifically with elevated levels of IL-10 and IFN-  $\gamma$ , but not IL-6 and TNF- $\alpha$ .  
694 This is in line with our current data in which IL-4, IL-10, and IFN-  $\gamma$  were concurrently elevated in  
695 middle-aged nulliparous rats. Thus, the cytokine profile in nulliparous groups may be alternatively  
696 driven by an increase in IL-4. We investigated correlations between peripheral cytokines and microglial  
697 morphology as a plethora of work suggests that systemic inflammation can profoundly affect microglial  
698 activation (Reviewed in Hoogland et al., 2015). Interestingly, we found that higher concentrations of IL-  
699 10 and IL-4 were associated with more de-ramified microglial morphology in primiparous but not  
700 nulliparous rats. The mechanisms and consequences of these altered relationships between peripheral  
701 cytokines and microglial morphology are not known, and these findings should be interpreted with  
702 caution, as the correlations were detected when age was not included as a factor. In the future, it is also  
703 important to examine whether parity may have similar effects on age-related changes in brain cytokines,  
704 particularly in the hippocampus. While the functional consequences of the observed differences in  
705 cytokine profiles cannot be determined from our current finding, we demonstrate here that the trajectory  
706 of immune senescence is altered by parity.

## 707 **5. Conclusions**

708 In summary, we report that maternal experience suppressed hippocampal neurogenesis (proliferation and  
709 immature neurons) during gestation and the postpartum period and mitigated the decline in neurogenesis  
710 in middle age (immature neurons). Maternal experience also resulted in transient microglial de-  
711 ramification in the dentate gyrus, suggesting the existence of a pro-inflammatory hippocampal  
712 environment in the early postpartum period. In addition to short-term cytokine alterations, maternal  
713 experience modified the trajectory of age-related changes in circulating cytokine levels. These findings  
714 should encourage future work aimed at delineating the functional consequences for behaviour and  
715 immune function across the peripartum period and beyond, especially in relation to maternal mood and  
716 cognition. Importantly, our data provide support for the notion that female reproductive history should  
717 be regarded as an important determinant of ageing-related changes in physiology.

## 718 **Acknowledgments**

719 The Authors thank Dr. Timothy Kieffer and Travis Webber for generously providing access to their



720 Sector Imager, and Arianne Albert for her assistance with principal component analyses.

721 **Funding**

722 This work was supported by a grant from the Canadian Institute of Health Research to LAMG  
723 (PJT148662), and a Four-Year Doctoral Fellowship from the University of British Columbia to RM.

724 **Conflicts of Interest**

725 The authors declare no conflicts of interest.

**Table 1.** Mean number of Iba-1-IR cells used for process length analyses  $\pm$  standard error of the mean. There were no significant differences between groups.

| Group                 | Number of Iba-1-IR cells analyzed |
|-----------------------|-----------------------------------|
| Nulliparous – 7 mo.   | 23.40 $\pm$ 1.03                  |
| Nulliparous – 7.5 mo. | 21.00 $\pm$ 2.04                  |
| Nulliparous – 8 mo.   | 20.80 $\pm$ 2.13                  |
| Nulliparous – 10 mo.  | 21.20 $\pm$ 1.16                  |
| Nulliparous – 13 mo.  | 22.25 $\pm$ 2.32                  |
| Primiparous – GD13    | 23.67 $\pm$ 1.67                  |
| Primiparous – PPD8    | 22.00 $\pm$ 0.77                  |
| Primiparous – PPD30   | 23.60 $\pm$ 1.47                  |
| Primiparous – PPD90   | 20.60 $\pm$ 1.03                  |
| Primiparous – PPD180  | 23.20 $\pm$ 0.37                  |

**Table 2.** Mean percentage of proliferative, intermediate, and post-mitotic doublecortin (DCX)-immunoreactive (IR) cells in the granule cell layer  $\pm$  standard error of the mean. Parity and age did not significantly affect the maturational stage of DCX-IR cells.

| Group                 | % Proliferative  | % Intermediate   | % Post-mitotic   |
|-----------------------|------------------|------------------|------------------|
| Nulliparous – 7 mo.   | 37.60 $\pm$ 1.60 | 17.20 $\pm$ 2.15 | 45.20 $\pm$ 2.65 |
| Nulliparous – 7.5 mo. | 26.40 $\pm$ 2.86 | 18.80 $\pm$ 1.85 | 54.80 $\pm$ 2.87 |
| Nulliparous – 8 mo.   | 35.60 $\pm$ 4.71 | 20.80 $\pm$ 1.02 | 46.40 $\pm$ 4.45 |
| Nulliparous – 10 mo.  | 29.60 $\pm$ 6.52 | 21.60 $\pm$ 2.64 | 48.80 $\pm$ 4.84 |
| Nulliparous – 13 mo.  | 25.33 $\pm$ 8.74 | 20.00 $\pm$ 1.15 | 54.67 $\pm$ 8.97 |
| Primiparous – GD13    | 32.00 $\pm$ 6.23 | 18.40 $\pm$ 2.93 | 49.60 $\pm$ 5.84 |
| Primiparous – PPD8    | 28.40 $\pm$ 5.31 | 16.00 $\pm$ 1.10 | 56.40 $\pm$ 6.71 |
| Primiparous – PPD30   | 27.60 $\pm$ 4.26 | 17.20 $\pm$ 0.80 | 55.20 $\pm$ 4.88 |
| Primiparous – PPD90   | 23.60 $\pm$ 3.19 | 16.80 $\pm$ 3.01 | 59.60 $\pm$ 4.53 |
| Primiparous – PPD180  | 28.40 $\pm$ 5.71 | 16.00 $\pm$ 2.45 | 56.00 $\pm$ 6.23 |

**Table 3.** Principal Component Analysis loading table.

|               | PC1         | PC2         | PC3         | PC4         |
|---------------|-------------|-------------|-------------|-------------|
| IFN- $\gamma$ | <b>0.87</b> | -0.28       | 0.01        | -0.04       |
| IL-10         | <b>0.91</b> | -0.15       | -0.12       | 0.027       |
| IL-13         | <b>0.87</b> | -0.18       | 0.27        | 0.12        |
| IL-1 $\beta$  | -0.06       | 0.25        | <b>0.78</b> | -0.46       |
| IL-4          | <b>0.89</b> | -0.17       | -0.05       | 0.03        |
| IL-5          | -0.24       | 0.10        | 0.30        | <b>0.87</b> |
| IL-6          | 0.46        | <b>0.77</b> | -0.11       | 0.091       |
| CXCL1         | 0.41        | 0.46        | 0.42        | 0.11        |
| TNF- $\alpha$ | 0.25        | <b>0.77</b> | -0.39       | -0.096      |

## 726 **References**

- 727 Aghaeepour, N., Ganio, E.A., Mcilwain, D., Tsai, A.S., Tingle, M., Van Gassen, S., Gaudilliere, D.K.,  
728 Baca, Q., McNeil, L., Okada, R., Ghaemi, M.S., Furman, D., Wong, R.J., Winn, V.D., Druzin,  
729 M.L., El-Sayed, Y.Y., Quaintance, C., Gibbs, R., Darmstadt, G.L., Shaw, G.M., Stevenson, D.K.,  
730 Tibshirani, R., Nolan, G.P., Lewis, D.B., Angst, M.S., Gaudilliere, B., 2017. An immune clock of  
731 human pregnancy. *Sci. Immunol.* doi:10.1126/sciimmunol.aan2946
- 732 Altman, J., Das, G.D., 1965. Autoradiographic and histological evidence of postnatal hippocampal  
733 neurogenesis in rats. *J. Comp. Neurol.* 124, 319–335. doi:10.1002/cne.901240303
- 734 Banasr, M., Hery, M., Brezun, J.M., Daszuta, A., 2001. Serotonin mediates oestrogen stimulation of cell  
735 proliferation in the adult dentate gyrus. *Eur. J. Neurosci.* 14, 1417–1424. doi:10.1046/j.0953-  
736 816X.2001.01763.x
- 737 Barha, C.K., Galea, L.A.M., 2011. Motherhood alters the cellular response to estrogens in the  
738 hippocampus later in life. *Neurobiol. Aging* 32, 2091–2095.  
739 doi:10.1016/j.neurobiolaging.2009.12.004
- 740 Barha, C.K., Hanna, C.W., Salvante, K.G., Wilson, S.L., Robinson, W.P., Altman, R.M., Nepomnaschy,  
741 P.A., 2016. Number of children and telomere length in women: A prospective, longitudinal  
742 evaluation. *PLoS One* 11. doi:10.1371/journal.pone.0146424
- 743 Barha, C.K., Lieblich, S.E., Chow, C., Galea, L.A.M., 2015. Multiparity-induced enhancement of  
744 hippocampal neurogenesis and spatial memory depends on ovarian hormone status in middle age.  
745 *Neurobiol. Aging* 36, 2391–2405. doi:10.1016/j.neurobiolaging.2015.04.007
- 746 Barrat, F., Lesourd, B., Boulouis, H.J., Thibault, D., Vincent-Naulleau, S., Gjata, B., Louise, A., Neway,  
747 T., Pilet, C., 1997a. Sex and parity modulate cytokine production during murine ageing. *Clin. Exp.*  
748 *Immunol.* 109, 562–568. doi:10.1046/j.1365-2249.1997.4851387.x
- 749 Barrat, F., Lesourd, B.M., Louise, A., Boulouis, H.J., Vincent-Naulleau, S., Thibault, D., Sanaa, M.,  
750 Neway, T., Pilet, C.H., 1997b. Surface antigen expression in spleen cells of C57B1/6 mice during  
751 ageing: influence of sex and parity. *Clin. Exp. Immunol.* 107, 593–600. doi:10.1046/j.1365-  
752 2249.1997.3021199.x
- 753 Barrat, F.S., Lesourd, B.M., Louise, A.S., Boulouis, H.J., Thibault, D.J., Neway, T., Pilet, C.A., 1999.

- 754 Pregnancies modulate B lymphopoiesis and myelopoiesis during murine ageing. *Immunology* 98,  
755 604–611. doi:10.1046/j.1365-2567.1999.00918.x
- 756 Beerli, M.S., Rapp, M., Schmeidler, J., Reichenberg, A., Purohit, D.P., Perl, D.P., Grossman, H.T.,  
757 Prohovnik, I., Haroutunian, V., Silverman, J.M., 2009. Number of children is associated with  
758 neuropathology of Alzheimer's disease in women. *Neurobiol. Aging* 30, 1184–1191.  
759 doi:10.1016/j.neurobiolaging.2007.11.011
- 760 Bennett, H.A., Einarson, A., Taddio, A., Koren, G., Einarson, T.R., 2004. Prevalence of depression  
761 during pregnancy: systematic review. *Obs. Gynecol* 103, 698–709.  
762 doi:10.1097/01.AOG.0000116689.75396.5f
- 763 Bhattarai, P., Thomas, A.K., Cosacak, M.I., Papadimitriou, C., Mashkaryan, V., Froc, C., Reinhardt, S.,  
764 Kurth, T., Dahl, A., Zhang, Y., Kizil, C., 2016. IL4/STAT6 Signaling Activates Neural Stem Cell  
765 Proliferation and Neurogenesis upon Amyloid- $\beta$ 42 Aggregation in Adult Zebrafish Brain. *Cell Rep.*  
766 17, 941–948. doi:10.1016/j.celrep.2016.09.075
- 767 Boche, D., Perry, V.H., Nicoll, J.A.R., 2013. Review: Activation patterns of microglia and their  
768 identification in the human brain. *Neuropathol. Appl. Neurobiol.* doi:10.1111/nan.12011
- 769 Bodnar, T.S., Taves, M.D., Lavigne, K.M., Woodward, T.S., Soma, K.K., Weinberg, J., 2017.  
770 Differential activation of endocrine-immune networks by arthritis challenge: Insights from colony-  
771 specific responses. *Sci. Rep.* 7, 1–14. doi:10.1038/s41598-017-00652-4
- 772 Boldrini, M., Fulmore, C.A., Tartt, A.N., Simeon, L.R., Pavlova, I., Poposka, V., Rosoklija, G.B.,  
773 Stankov, A., Arango, V., Dwork, A.J., Hen, R., Mann, J.J., 2018. Human Hippocampal  
774 Neurogenesis Persists throughout Aging. *Cell Stem Cell* 589–599. doi:10.1016/j.stem.2018.03.015
- 775 Bridges, R.S., 2015. Neuroendocrine regulation of maternal behavior. *Front. Neuroendocrinol.*  
776 doi:10.1016/j.yfrne.2014.11.007
- 777 Brown, J.P., Couillard-Després, S., Cooper-Kuhn, C.M., Winkler, J., Aigner, L., Kuhn, H.G., 2003.  
778 Transient Expression of Doublecortin during Adult Neurogenesis. *J. Comp. Neurol.* 467, 1–10.  
779 doi:10.1002/cne.10874
- 780 Campbell, S., MacQueen, G., 2004. The role of the hippocampus in the pathophysiology of major  
781 depression. [Review] [121 refs]. *J. Psychiatry & Neurosci.* 29, 417–426.

- 782 Catalano, R.D., Lannagan, T.R.M., Gorowiec, M., Denison, F.C., Norman, J.E., Jabbour, H.N., 2010.  
783 Prokineticins: Novel mediators of inflammatory and contractile pathways at parturition? *Mol. Hum.*  
784 *Reprod.* doi:10.1093/molehr/gaq014
- 785 Colucci, M., Cammarata, S., Assini, A., Croce, R., Clerici, F., Novello, C., Mazzella, L., Dagnino, N.,  
786 Mariani, C., Tanganelli, P., 2006. The number of pregnancies is a risk factor for Alzheimer's  
787 disease. *Eur. J. Neurol.* 13, 1374–1377. doi:10.1111/j.1468-1331.2006.01520.x
- 788 Corbo, R.M., Gambina, G., Ulizzi, L., Monini, P., Broggio, E., Rosano, A., Scacchi, R., 2007.  
789 Combined effect of apolipoprotein e genotype and past fertility on age at onset of Alzheimer's  
790 disease in women. *Dement. Geriatr. Cogn. Disord.* 24, 82–85. doi:10.1159/000103866
- 791 Cui, J., Jothishankar, B., He, P., Staufenbiel, M., Shen, Y., Li, R., 2014. Amyloid precursor protein  
792 mutation disrupts reproductive experience-enhanced normal cognitive development in a mouse  
793 model of alzheimer's disease. *Mol. Neurobiol.* 49, 103–112. doi:10.1007/s12035-013-8503-x
- 794 Cuttler, C., Graf, P., Pawluski, J.L., Galea, L. a M., 2011. Everyday life memory deficits in pregnant  
795 women. *Can. J. Exp. Psychol.* 65, 27–37. doi:10.1037/a0022844
- 796 Darcy, J.M., Grzywacz, J.G., Stephens, R.L., Leng, I., Clinch, C.R., Arcury, T.A., 2011. Maternal  
797 Depressive Symptomatology: 16-Month Follow-up of Infant and Maternal Health-Related Quality  
798 of Life. *J. Am. Board Fam. Med.* 24, 249–257. doi:10.3122/jabfm.2011.03.100201
- 799 Darnaudéry, M., Perez-Martin, M., Del Favero, F., Gomez-Roldan, C., Garcia-Segura, L.M., Maccari,  
800 S., 2007. Early motherhood in rats is associated with a modification of hippocampal function.  
801 *Psychoneuroendocrinology* 32, 803–812. doi:10.1016/j.psyneuen.2007.05.012
- 802 De Groot, R.H., Vuurman, E.F., Hornstra, G., Jolles, J., 2006. Differences in cognitive performance  
803 during pregnancy and early motherhood. *Psychol. Med.* 36, 1023–1032.  
804 doi:10.1017/S0033291706007380
- 805 De Weerth, C., Buitelaar, J.K., 2005. Physiological stress reactivity in human pregnancy - A review, in:  
806 *Neuroscience and Biobehavioral Reviews.* pp. 295–312. doi:10.1016/j.neubiorev.2004.10.005
- 807 Driscoll, I., Howard, S.R., Stone, J.C., Monfils, M.H., Tomanek, B., Brooks, W.M., Sutherland, R.J.,  
808 2006. The aging hippocampus: A multi-level analysis in the rat. *Neuroscience* 139, 1173–1185.  
809 doi:10.1016/j.neuroscience.2006.01.040

- 810 Dulac, C., O'Connell, L.A., Wu, Z., 2014. Neural control of maternal and paternal behaviors. *Science*  
811 (80-. ). 345, 765–770. doi:10.1126/science.1253291
- 812 Ekdahl, C.T., Claasen, J.-H., Bonde, S., Kokaia, Z., Lindvall, O., 2003. Inflammation is detrimental for  
813 neurogenesis in adult brain. *Proc. Natl. Acad. Sci.* 100, 13632–13637.  
814 doi:10.1073/pnas.2234031100
- 815 Eriksson, P.S., Perfilieva, E., Björk-Eriksson, T., Alborn, A.M., Nordborg, C., Peterson, D.A., Gage,  
816 F.H., 1998. Neurogenesis in the adult human hippocampus. *Nat. Med.* 4, 1313–7. doi:10.1038/3305
- 817 Furuta, M., Bridges, R.S., 2005. Gestation-induced cell proliferation in the rat brain. *Brain Res Dev*  
818 *Brain Res* 156, 61–66.
- 819 Galea, L.A.M., Leuner, B., Slattey, D.A., 2014. Hippocampal plasticity during the peripartum period:  
820 Influence of sex steroids, stress and ageing. *J. Neuroendocrinol.* doi:10.1111/jne.12177
- 821 Galea, L.A.M., Ormerod, B.K., Sampath, S., Kostaras, X., Wilkie, D.M., Phelps, M.T., 2000. Spatial  
822 Working Memory and Hippocampal Size across Pregnancy in Rats. *Horm. Behav.* 37, 86–95.  
823 doi:10.1006/hbeh.1999.1560
- 824 Galea, L.A.M., Roes, M.M., Dimech, C.J., Chow, C., Mahmoud, R., Lieblich, S.E., Duarte-Guterman,  
825 P., 2018. Premarin has opposing effects on spatial learning, neural activation, and serum cytokine  
826 levels in middle-aged female rats depending on reproductive history. *Neurobiol. Aging* 70, 291–  
827 307. doi:10.1016/j.neurobiolaging.2018.06.030
- 828 Gatewood, J.D., Morgan, M.D., Eaton, M., McNamara, I.M., Stevens, L.F., MacBeth, A.H., Meyer,  
829 E.A.A., Lomas, L.M., Kozub, F.J., Lambert, K.G., Kinsley, C.H., 2005. Motherhood mitigates  
830 aging-related decrements in learning and memory and positively affects brain aging in the rat. *Brain*  
831 *Res. Bull.* 66, 91–98. doi:10.1016/j.brainresbull.2005.03.016
- 832 Groer, M.E., Jevitt, C., Ji, M., 2015. Immune Changes and Dysphoric Moods Across the Postpartum.  
833 *Am. J. Reprod. Immunol.* 73, 193–198. doi:10.1111/aji.12322
- 834 Guerreiro, R.J., Santana, I., Brás, J.M., Santiago, B., Paiva, A., Oliveira, C., 2007. Peripheral  
835 inflammatory cytokines as biomarkers in Alzheimer's disease and mild cognitive impairment.  
836 *Neurodegener. Dis.* 4, 406–412. doi:10.1159/000107700

- 837 Haim, A., Julian, D., Albin-Brooks, C., Brothers, H.M., Lenz, K.M., Leuner, B., 2017. A survey of  
838 neuroimmune changes in pregnant and postpartum female rats. *Brain. Behav. Immun.* 59, 67–78.  
839 doi:10.1016/j.bbi.2016.09.026
- 840 Hall, M.E., George, E.M., Granger, J.P., 2011. The Heart During Pregnancy. *Rev. Española Cardiol.*  
841 (English Ed. 64, 1045–1050. doi:10.1016/j.rec.2011.07.008
- 842 Hart, P.H., Vitti, G.F., Burgess, D.R., Whitty, G.A., Piccoli, D.S., Hamilton, J.A., 1989. Potential  
843 antiinflammatory effects of interleukin 4: suppression of human monocyte tumor necrosis factor  
844 alpha, interleukin 1, and prostaglandin E2. *Proc. Natl. Acad. Sci.* 86, 3803–3807.  
845 doi:10.1073/pnas.86.10.3803
- 846 Helle, S., Lummaa, V., Jokela, J., 2004. Accelerated immunosenescence in preindustrial twin mothers.  
847 *Proc. Natl. Acad. Sci. U. S. A.* 101, 12391–12396. doi:10.1073/pnas.0402215101
- 848 Hendrick, V., Altshuler, L.L., Suri, R., 1998. Hormonal Changes in the Postpartum and Implications for  
849 Postpartum Depression. *Psychosomatics* 39, 93–101. doi:10.1016/S0033-3182(98)71355-6
- 850 Hodes, G.E., Pfau, M.L., Leboeuf, M., Golden, S.A., Christoffel, D.J., Bregman, D., Rebusi, N.,  
851 Heshmati, M., Aleyasin, H., Warren, B.L., Labonté, B., Horn, S., Lapidus, K.A., Stelzhammer, V.,  
852 Wong, E.H.F., Bahn, S., Krishnan, V., Bolaños-Guzman, C.A., Murrough, J.W., Merad, M., Russo,  
853 S.J., 2014. Individual differences in the peripheral immune system promote resilience versus  
854 susceptibility to social stress. *Proc. Natl. Acad. Sci.* 111, 16136–16141.  
855 doi:10.1073/pnas.1415191111
- 856 Hoekzema, E., Barba-Müller, E., Pozzobon, C., Picado, M., Lucco, F., García-García, D., Soliva, J.C.,  
857 Tobeña, A., Desco, M., Crone, E.A., Ballesteros, A., Carmona, S., Vilarroya, O., 2016. Pregnancy  
858 leads to long-lasting changes in human brain structure. *Nat. Neurosci.* doi:10.1038/nn.4458
- 859 Holtan, S.G., Chen, Y., Kaimal, R., Creedon, D.J., Enninga, E.A.L., Nevala, W.K., Markovic, S.N.,  
860 2015. Growth modeling of the maternal cytokine milieu throughout normal pregnancy:  
861 Macrophage-derived chemokine decreases as inflammation/counterregulation increases. *J.*  
862 *Immunol. Res.* 2015. doi:10.1155/2015/952571
- 863 Hoogland, I.C.M., Houbolt, C., van Westerloo, D.J., van Gool, W.A., van de Beek, D., 2015. Systemic  
864 inflammation and microglial activation: systematic review of animal experiments. *J.*

- 865 Neuroinflammation 12, 114. doi:10.1186/s12974-015-0332-6
- 866 Karperien, A., Ahammer, H., Jelinek, H.F., 2013. Quantitating the subtleties of microglial morphology  
867 with fractal analysis. *Front. Cell. Neurosci.* doi:10.3389/fncel.2013.00003
- 868 Kinsley, C.H., Madonia, L., Gifford, G.W., Tureski, K., Griffin, G.R., Lowry, C., Williams, J., Collins,  
869 J., McLearnie, H., Lambert, K.G., 1999. Motherhood improves learning and memory. *Nature* 402,  
870 137–138. doi:10.1038/45957
- 871 Korzhevskii, D.E., Kirik, O. V., 2016. Brain Microglia and Microglial Markers. *Neurosci. Behav.*  
872 *Physiol.* 46, 284–290. doi:10.1007/s11055-016-0231-z
- 873 Kreisel, T., Frank, M.G., Licht, T., Reshef, R., Ben-Menachem-Zidon, O., Baratta, M. V, Maier, S.F.,  
874 Yirmiya, R., 2014. Dynamic microglial alterations underlie stress-induced depressive-like behavior  
875 and suppressed neurogenesis. *Mol. Psychiatry* 19, 699–709. doi:10.1038/mp.2013.155
- 876 Kuhn, H.G., Dickinson-Anson, H., Gage, F.H., 1996. Neurogenesis in the dentate gyrus of the adult rat:  
877 age-related decrease of neuronal progenitor proliferation. *J Neurosci* 16, 2027–2033. doi:10.1523/JNEUROSCI.1000-96.1996
- 878 Lain, K.Y., Catalano, P.M., 2007. Metabolic changes in pregnancy. *Clin. Obstet. Gynecol.* 50, 938–948.  
879 doi:10.1097/GRF.0b013e31815a5494
- 880 Lee, J., Lee, Y., Yuk, D., Choi, D., Ban, S., Oh, K., Hong, J., 2008. Neuro-inflammation induced by  
881 lipopolysaccharide causes cognitive impairment through enhancement of beta-amyloid generation.  
882 *J. Neuroinflammation* 5, 37. doi:10.1186/1742-2094-5-37
- 883 Leuner, B., Christian, M., Liron, N., Elizabeth, G., 2007. Maternal Experience Inhibits the Production of  
884 Immature Neurons in the Hippocampus During the Postpartum Period Through. *Hippocampus* 17,  
885 434–442. doi:10.1002/hipo
- 886 Leuner, B., Gould, E., 2010. Dendritic growth in medial prefrontal cortex and cognitive flexibility are  
887 enhanced during the postpartum period. *J. Neurosci.* 30, 13499–503.  
888 doi:10.1523/JNEUROSCI.3388-10.2010
- 889 Lightman, S.L., Windle, R.J., Wood, S.A., Kershaw, Y.M., Shanks, N., Ingram, C.D., 2001. Peripartum  
890 plasticity within the hypothalamo-pituitary-adrenal axis, in: *Progress in Brain Research*. pp. 111–  
891 129. doi:10.1016/S0079-6123(01)33009-1



- 892 Loftis, J.M., Huckans, M., Morasco, B.J., 2010. Neuroimmune mechanisms of cytokine-induced  
893 depression: Current theories and novel treatment strategies. *Neurobiol. Dis.*  
894 doi:10.1016/j.nbd.2009.11.015
- 895 Louveau, A., Harris, T.H., Kipnis, J., 2015. Revisiting the Mechanisms of CNS Immune Privilege.  
896 *Trends Immunol.* doi:10.1016/j.it.2015.08.006
- 897 Luo, X.-G., Chen, S.-D., 2012. The changing phenotype of microglia from homeostasis to disease.  
898 *Transl. Neurodegener.* 1, 9. doi:10.1186/2047-9158-1-9
- 899 Mahmoud, R., Wainwright, S.R., Chaiton, J.A., Liebllich, S.E., Galea, L.A.M., 2016a. Ovarian  
900 hormones, but not fluoxetine, impart resilience within a chronic unpredictable stress model in  
901 middle-aged female rats. *Neuropharmacology* 107, 278–293.  
902 doi:10.1016/j.neuropharm.2016.01.033
- 903 Mahmoud, R., Wainwright, S.R., Galea, L.A.M., 2016b. Sex hormones and adult hippocampal  
904 neurogenesis: Regulation, implications, and potential mechanisms. *Front. Neuroendocrinol.* 41,  
905 129–152. doi:10.1016/j.yfrne.2016.03.002
- 906 Miller, A.H., Haroon, E., Raison, C.L., Felger, J.C., 2014. Cytokine Targets in the Brain: Impact on  
907 Neurotransmitters and Neurocircuits Andrew. *Depress Anxiety* 30, 297–306. doi:10.1146/annurev-  
908 cellbio-092910-154240.Sensory
- 909 Miller, A.H., Raison, C.L., 2015. The role of inflammation in depression: from evolutionary imperative  
910 to modern treatment target. *Nat. Rev. Immunol.* 16, 22–34. doi:10.1038/nri.2015.5
- 911 Milner, J.D., Orekov, T., Ward, J.M., Cheng, L., Torres-Velez, F., Junttila, I., Sun, G., Buller, M.,  
912 Morris, S.C., Finkelman, F.D., Paul, W.E., 2010. Sustained IL-4 exposure leads to a novel pathway  
913 for hemophagocytosis, inflammation, and tissue macrophage accumulation. *Blood* 116, 2476–2483.  
914 doi:10.1182/blood-2009-11-255174
- 915 Monje, M.L., 2003. Inflammatory Blockade Restores Adult Hippocampal Neurogenesis. *Science* (80-. ).  
916 302, 1760–1765. doi:10.1126/science.1088417
- 917 Mor, G., Cardenas, I., 2010. The Immune System in Pregnancy: A Unique Complexity. *Am. J. Reprod.*  
918 *Immunol.* doi:10.1111/j.1600-0897.2010.00836.x

- 919 Nacher, J., Alonso-Llosa, G., Rosell, D.R., McEwen, B.S., 2003. NMDA receptor antagonist treatment  
920 increases the production of new neurons in the aged rat hippocampus. *Neurobiol Aging* 24, 273–  
921 284. doi:S0197458002000969 [pii]
- 922 Nimmerjahn, A., Kirchhoff, F., Helmchen, F., 2005. Neuroscience: Resting microglial cells are highly  
923 dynamic surveillants of brain parenchyma in vivo. *Science* (80-. ). doi:10.1126/science.1110647
- 924 O’Hara, M.W., 2009. Postpartum depression: What we know. *J. Clin. Psychol.* doi:10.1002/jclp.20644
- 925 Oatridge, A., Holdcroft, A., Saeed, N., Hajnal, J. V., Puri, B.K., Fusi, L., Bydder, G.M., 2002. Change in  
926 brain size during and after pregnancy: Study in healthy women and women with preeclampsia. *Am.*  
927 *J. Neuroradiol.* 23, 19–26.
- 928 Overstreet-Wadiche, L.S., Bromberg, D. a, Bensen, A.L., Westbrook, G.L., 2006. Seizures accelerate  
929 functional integration of adult-generated granule cells. *J. nNeuroscience.*  
930 doi:10.1523/JNEUROSCI.5508-05.2006
- 931 Oxenkrug, G.F., 2011. Interferon-gamma-inducible kynurenines/pteridines inflammation cascade:  
932 Implications for aging and aging-associated psychiatric and medical disorders. *J. Neural Transm.*  
933 118, 75–85. doi:10.1007/s00702-010-0475-7
- 934 Parkhurst, C.N., Yang, G., Ninan, I., Savas, J.N., Yates, J.R., Lafaille, J.J., Hempstead, B.L., Littman,  
935 D.R., Gan, W.B., 2013. Microglia promote learning-dependent synapse formation through brain-  
936 derived neurotrophic factor. *Cell* 155, 1596–1609. doi:10.1016/j.cell.2013.11.030
- 937 Pawluski, J.L., Barakauskas, V.E., Galea, L.A.M., 2010. Pregnancy decreases oestrogen receptor alpha  
938 expression and pyknosis, but not cell proliferation or survival, in the hippocampus. *J.*  
939 *Neuroendocrinol.* 22, 248–257. doi:10.1111/j.1365-2826.2010.01960.x
- 940 Pawluski, J.L., Galea, L.A.M., 2007. Reproductive experience alters hippocampal neurogenesis during  
941 the postpartum period in the dam. *Neuroscience* 149, 53–67.  
942 doi:10.1016/j.neuroscience.2007.07.031
- 943 Pawluski, J.L., Galea, L.A.M., 2006. Hippocampal morphology is differentially affected by reproductive  
944 experience in the mother. *J. Neurobiol.* 66, 71–81. doi:10.1002/neu.20194
- 945 Pawluski, J.L., Walker, S.K., Galea, L.A.M., 2006. Reproductive experience differentially affects spatial

- 946 reference and working memory performance in the mother. *Horm. Behav.* 49, 143–149.  
947 doi:10.1016/j.yhbeh.2005.05.016
- 948 Plümpe, T., Ehninger, D., Steiner, B., Klempin, F., Jessberger, S., Brandt, M., Römer, B., Rodriguez,  
949 G.R., Kronenberg, G., Kempermann, G., 2006. Variability of doublecortin-associated dendrite  
950 maturation in adult hippocampal neurogenesis is independent of the regulation of precursor cell  
951 proliferation. *BMC Neurosci.* 7, 77. doi:10.1186/1471-2202-7-77
- 952 Posillico, C.K., Schwarz, J.M., 2016. An investigation into the effects of antenatal stressors on the  
953 postpartum neuroimmune profile and depressive-like behaviors. *Behav. Brain Res.* 298, 218–228.  
954 doi:10.1016/j.bbr.2015.11.011
- 955 PrabhuDas, M., Bonney, E., Caron, K., Dey, S., Erlebacher, A., Fazleabas, A., Fisher, S., Golos, T.,  
956 Matzuk, M., McCune, J.M., Mor, G., Schulz, L., Soares, M., Spencer, T., Strominger, J., Way, S.S.,  
957 Yoshinaga, K., Loreau, M., Naeem, S., Inchausti, P., 2015. Immune mechanisms at the maternal-  
958 fetal interface: perspectives and challenges. *Nat. Immunol.* 16, 237–243.  
959 doi:10.1038/ni.3131.Immune
- 960 Quan, N., Banks, W.A., 2007. Brain-immune communication pathways. *Brain. Behav. Immun.*  
961 doi:10.1016/j.bbi.2007.05.005
- 962 Rannevik, G., Carlström, K., Jeppsson, S., Bjerre, B., Svanberg, L., 1986. A prospective long-term study  
963 in women from pre-menopause to post-menopause: changing profiles of gonadotrophins,  
964 oestrogens and androgens. *Maturitas.* doi:10.1016/0378-5122(86)90038-1
- 965 Rodríguez, M.I., Escames, G., López, L.C., López, A., García, J.A., Ortiz, F., Acuña-Castroviejo, D.,  
966 2007. Chronic melatonin treatment reduces the age-dependent inflammatory process in senescence-  
967 accelerated mice. *J. Pineal Res.* 42, 272–279. doi:10.1111/j.1600-079X.2006.00416.x
- 968 Rolls, A., Schori, H., London, A., Schwartz, M., 2008. Decrease in hippocampal neurogenesis during  
969 pregnancy: a link to immunity. *Mol. Psychiatry* 13, 468–469. doi:10.1038/sj.mp.4002126
- 970 Rosenblatt, J.S., Mayer, A.D., Giordano, A.L., 1988. Hormonal basis during pregnancy for the onset of  
971 maternal behavior in the rat. *Psychoneuroendocrinology.* doi:10.1016/0306-4530(88)90005-4
- 972 Rossant, J., Cross, J.C., 2001. PLACENTAL DEVELOPMENT: LESSONS FROM MOUSE  
973 MUTANTS. *Nat. Rev. Genet.* 2, 538–548. doi:10.1038/35080570

- 974 Rutishauser, U., 2008. Polysialic acid in the plasticity of the developing and adult vertebrate nervous  
975 system. *Nat. Rev. Neurosci.* 9, 26–35. doi:10.1038/nrn2285
- 976 Sahay, A., Hen, R., 2007. Adult hippocampal neurogenesis in depression. *Nat. Neurosci.* 10, 1110–5.  
977 doi:10.1038/nrn1969
- 978 Schloesser, R.J., Manji, H.K., Martinowich, K., 2009. Suppression of adult neurogenesis leads to an  
979 increased hypothalamo-pituitary-adrenal axis response. *Neuroreport* 20, 553–557.  
980 doi:10.1097/WNR.0b013e3283293e59
- 981 Scholzen, T., Gerdes, J., 2000. The Ki-67 protein: From the known and the unknown. *J. Cell. Physiol.*  
982 doi:10.1002/(SICI)1097-4652(200003)182:3<311::AID-JCP1>3.0.CO;2-9
- 983 Schumacher, A., Costa, S.D., Zenclussen, A.C., 2014. Endocrine factors modulating immune responses  
984 in pregnancy. *Front. Immunol.* doi:10.3389/fimmu.2014.00196
- 985 Schwarz, J.M., Sholar, P.W., Bilbo, S.D., 2012. Sex differences in microglial colonization of the  
986 developing rat brain. *J. Neurochem.* doi:10.1111/j.1471-4159.2011.07630.x
- 987 Setiawan, E., Wilson, A.A., Mizrahi, R., Rusjan, P.M., Miler, L., Rajkowska, G., Suridjan, I., Kennedy,  
988 J.L., Rekkas, P.V., Houle, S., Meyer, J.H., 2015. Role of Translocator Protein Density, a Marker of  
989 Neuroinflammation, in the Brain During Major Depressive Episodes. *JAMA Psychiatry* 72, 268.  
990 doi:10.1001/jamapsychiatry.2014.2427
- 991 Shimaoka, Y., Hidaka, Y., Tada, H., Amino, N., Nakamura, T., Murata, Y., Mitsuda, N., Morimoto, Y.,  
992 2000. Changes in cytokine production during and after normal pregnancy. *Am J Reprod Immunol*  
993 44, 143–147.
- 994 Shingo, T., Gregg, C., Enwere, E., Fujikawa, H., Hassam, R., Geary, C., Cross, J.C., Weiss, S., 2003.  
995 Pregnancy-stimulated neurogenesis in the adult female forebrain mediated by prolactin. *Science*  
996 299, 117–20. doi:10.1126/science.1076647
- 997 Sierra, A., Beccari, S., Diaz-Aparicio, I., Encinas, J.M., Comeau, S., Tremblay, M.È., 2014.  
998 Surveillance, phagocytosis, and inflammation: How never-resting microglia influence adult  
999 hippocampal neurogenesis. *Neural Plast.* doi:10.1155/2014/610343
- 1000 Sierra, A., Encinas, J.M., Deudero, J.J.P., Chancey, J.H., Enikolopov, G., Overstreet-Wadiche, L.S.,

- 1001 Tsirka, S.E., Maletic-Savatic, M., 2010. Microglia shape adult hippocampal neurogenesis through  
1002 apoptosis-coupled phagocytosis. *Cell Stem Cell* 7, 483–495. doi:10.1016/j.stem.2010.08.014
- 1003 Slattery, D.A., Neumann, I.D., 2008. No stress please! Mechanisms of stress hyporesponsiveness of the  
1004 maternal brain. *J. Physiol.* 586, 377–385. doi:10.1113/jphysiol.2007.145896
- 1005 Snyder, J.S., Soumier, A., Brewer, M., Pickel, J., Cameron, H.A., 2011. Adult hippocampal  
1006 neurogenesis buffers stress responses and depressive behaviour. *Nature* 476, 458–461.  
1007 doi:10.1038/nature10287
- 1008 Sweatt, J.D., 2004. Hippocampal function in cognition. *Psychopharmacology (Berl)*. 174.  
1009 doi:10.1007/s00213-004-1795-9
- 1010 vom Berg, J., Prokop, S., Miller, K.R., Obst, J., Kälin, R.E., Lopategui-Cabezas, I., Wegner, A., Mair,  
1011 F., Schipke, C.G., Peters, O., Winter, Y., Becher, B., Heppner, F.L., 2012. Inhibition of IL-12/IL-  
1012 23 signaling reduces Alzheimer’s disease-like pathology and cognitive decline. *Nat. Med.* 18,  
1013 1812–1819. doi:10.1038/nm.2965
- 1014 Workman, J.L., Barha, C.K., Galea, L.A.M., 2012. Endocrine substrates of cognitive and affective  
1015 changes during pregnancy and postpartum. *Behav. Neurosci.* 126, 54–72. doi:10.1037/a0025538
- 1016 Workman, J.L., Rainecki, C., Weinberg, J., Galea, L.A.M., 2015. Alcohol and pregnancy: Effects on  
1017 maternal care, HPA axis function, and hippocampal neurogenesis in adult females.  
1018 *Psychoneuroendocrinology* 57, 37–50. doi:10.1016/j.psyneuen.2015.03.001
- 1019 Yau, S., Li, A., So, K., 2015. Involvement of Adult Hippocampal Neurogenesis in 2015.
